# Supplementary material for: Somatic SF3B1 hotspot mutation in prolactinomas
Source: PubMed Central journal article supplement (PMC7237453; doi:10.1038/s41467-020-16052-8), 2020-05-19
Supplement: 41467_2020_16052_MOESM1_ESM.pdf [file 41467_2020_16052_MOESM1_ESM.pdf]

1  
2  
3  
4  
5  
6  
7  
8  
9  
10  
11  
12

**Supplementary Information for**

**Somatic *SF3B1* Hotspot Mutation in Prolactinomas**

**Authors:** Chuzhong Li<sup>1, 2, 3, 4</sup>†, Weiyan Xie<sup>1</sup>†, Jared Rosenblum<sup>5</sup>, Jianyu Zhou<sup>6</sup>, Jing Guo<sup>1, 2</sup>,  
Yazhou Miao<sup>1, 2</sup>, Yutao Shen<sup>1, 2</sup>, Hongyun Wang<sup>1</sup>, Lei Gong<sup>1</sup>, Mingxuan Li<sup>1, 2</sup>, Sida Zhao<sup>1, 2</sup>,  
Sen Cheng<sup>1, 2</sup>, Haibo Zhu<sup>1, 2</sup>, Tao Jiang<sup>6, 7</sup>, Shiyong Ling<sup>8</sup>, Fei Wang<sup>8</sup>, Hongwei Zhang<sup>9</sup>,  
Mingshan Zhang<sup>9</sup>, Yanming Qu<sup>9</sup>, Qi Zhang<sup>5</sup>, Guilin Li<sup>10</sup>, Junmei Wang<sup>10</sup>, Jun Ma<sup>11</sup>,  
Zhengping Zhuang<sup>5, 12</sup>\* & Yazhuo Zhang<sup>1, 2, 3, 4</sup>\*

\* Correspondence to: zhangyazhuo@ccmu.edu.cn; zhengping.zhuang@nih.gov

†These authors contributed equally to this work

## 13 **Materials and Methods**

### 14 **High Throughput Sequencing**

15 Whole genome sequencing of DNA extracted from 21 frozen tumors and matched  
16 peripheral blood was performed to investigate somatic alterations. Tiers for tumor-specific  
17 mutations were designated and annotated based on the methodological rigor for mutation  
18 calling. In order to determine gene expression level and alternative splicing events,  
19 transcriptome sequencing was conducted for 15 tumors and 10 normal tissues.

### 20 **DNA and RNA extractions**

21 The genomic DNA were extracted from frozen tissue species and peripheral blood using  
22 the AllPrep DNA/RNA Mini kit (80204, Qiagen) and DNeasy blood & tissue kit (69504,  
23 Qiagen), respectively. The genomic DNA were extracted from formalin-fixed, paraffin-  
24 embedded tumor tissues species and peripheral blood using the GeneRead DNA FFPE Kit  
25 (180134, Qiagen). The GeneRead DNA FFPE Kit provides a streamlined procedure that  
26 includes the removal of deaminated cytosine to prevent false results in DNA sequencing.

27 Total amount of 500ng DNA with high-molecular weight (>20Kb single band) was used  
28 for the library preparation. For RNA extractions, tissue sections from same patient and normal  
29 tissues from unrelated person were performed with the AllPrep DNA/RNA Mini kit according  
30 to the instructions of the manufacture. RNA degradation and contamination were monitored  
31 on 1% agarose gels. The RNA quality and quantity were assessed at the RNA Nano 6000  
32 Assay Kit of the Bioanalyzer 2100 system (Aligent Technologies, USA). Samples with RNA  
33 integrity number (RIN) of over 6.8 were further analyzed by RNA-seq.

### 34 **Whole genome sequencing and variant detection**

35 DNA and RNA sequencing and integrative analysis of omics data in this study were  
36 completed by Novogene Bioinformatics Institute. Sequencing library was constructed using  
37 Truseq Nano DNA HT Sample Prep Kit (FC-121-4003, Illumina) and sequenced on Illumina  
38 HiSeq X platform to an average depth of 54x for tumors and 34x for matched normals, with  
39 99.49% of the known genome being covered. After the exclusion of reads containing adapter

40 contamination and low-quality/unrecognizable nucleotides, clean data was mapped to the  
41 reference human genome (UCSC hg19) by Burrows-Wheeler Aligner (BWA) software<sup>1</sup> to get  
42 the original mapping results stored in BAM format. SAMtools<sup>2</sup>, Picard  
43 (<http://broadinstitute.github.io/picard/>), and GATK<sup>3</sup> were used to sort BAM files and do base  
44 quality recalibration, duplicate removing and local realignment to generate final BAM file for  
45 mutation calling. Somatic single nucleotide variations (SNVs) and small insertions and  
46 deletions (InDels) from paired tumor-normal samples were identified by MuTect<sup>4</sup> and  
47 Strelka<sup>5</sup> with default parameters.

48 Four post-processing filters were applied to the set of somatic variants detected by both  
49 algorithms to improve specificity as follows: (1) The mutation position should be covered by  
50 at least 5 reads in both tumors and their normal pairs; (2) Mutant alleles coverage in tumors  
51 should be more than 4X. Specifically, if the reads supporting variant alleles in tumors are  
52 more than 6, the allelic fraction should be more than 10%, otherwise, the allelic fraction in  
53 excess of 15% is necessary; (3) Alternate alleles observed in single directions of reads were  
54 excluded to ameliorate PCR artifact bias; (4) Putative somatic variants were cross-referenced  
55 with the panel of normal samples to identify calls coinciding with high error rate loci. The  
56 candidate present in two or more germline normal samples with at least 3 mutation-carrying  
57 reads was removed. Somatic variants were manually interrogated for accuracy by Integrative  
58 Genomics Viewer. We binned SNVs into three tiers. Tier1 contains SNVs validated by  
59 Sanger sequencing, Time of Flight Mass Spectrometer (TOF) or RNA-seq. Tier2 contains the  
60 remaining SNVs passing the four post-processing filters described before and meet tier1  
61 criteria. Tier3 contains all somatic nonsynonymous substitutions in the amino acid coding  
62 regions identified by MuTect and Strelka, and those meet tier2 criteria. The landscape is  
63 based on Tier2 for accuracy and comprehensiveness of mutation calling.

#### 64 **RNA-Seq data processing and analysis**

65 Raw data of fastq format were firstly processed in-house perl scripts and clean data were  
66 obtained by removing reads containing adapters, reads containing ploy-N and low-quality

67 reads. All the downstream analyses were based on the clean data with high quality. Paired-end  
68 RNA-seq clean reads were mapped to the human reference genome (NCBI37/hg19) using  
69 TopHat2<sup>6</sup>. The mapped reads of each sample were assembled by Cufflinks (v2.1.1)<sup>7</sup> in a  
70 reference-based approach. Cuffdiff (v2.1.1) ([http://cole-trapnell-](http://cole-trapnell-lab.github.io/cufflinks/cuffdiff/index.html)  
71 [lab.github.io/cufflinks/cuffdiff/index.html](http://cole-trapnell-lab.github.io/cufflinks/cuffdiff/index.html)) was used to determine the expression levels of  
72 both lncRNAs and coding genes in each sample. The expression is represented as FPKM  
73 values. FPKM means fragments per kilo-base of exon per million fragments mapped,  
74 calculated based on the length of the fragments and reads count mapped to this fragment.

### 75 **Splicing reporter assays**

76 A 515 kb region of the human ESRRG gene contains a fragment of the ESRRG  
77 gene spanning exons 5 and includes 353 bp of intron 4 sequences in this region, was  
78 amplified using the following primers: 5'-gtgcaaaatgtaaataacattc-3',  
79 5'-ctttgtattaatctacatgga-3', 5'-aaagtagaagtatttgctagga-3', 5'-aactatctgaaaattcaactc-3',  
80 5'-ggtaggtaccctacttcaccaaattcccacttaag-3', 5'-tagtggatccgcctggaatatgcttcgcccaccc-3'.  
81 The fragment was cloned into pcMINI-C. The splicing reporters were transfected into  
82 MCF7 cells and RNA were harvested after 36 h. Spliced products were amplified  
83 using the following primers: 5'-ctagagaaccctactgcttac-3', 5'-tagaaggcacagtcgagg-3'.  
84 This strategy amplified minigene-derived transcripts but not endogenous ESRRG  
85 mRNA. PCR products were analyzed on either 2% agarose gels. All PCR products  
86 were confirmed by DNA sequencing.

87  
88  
89  
90

91

92

93

94

95

96

97

98

99

100

101

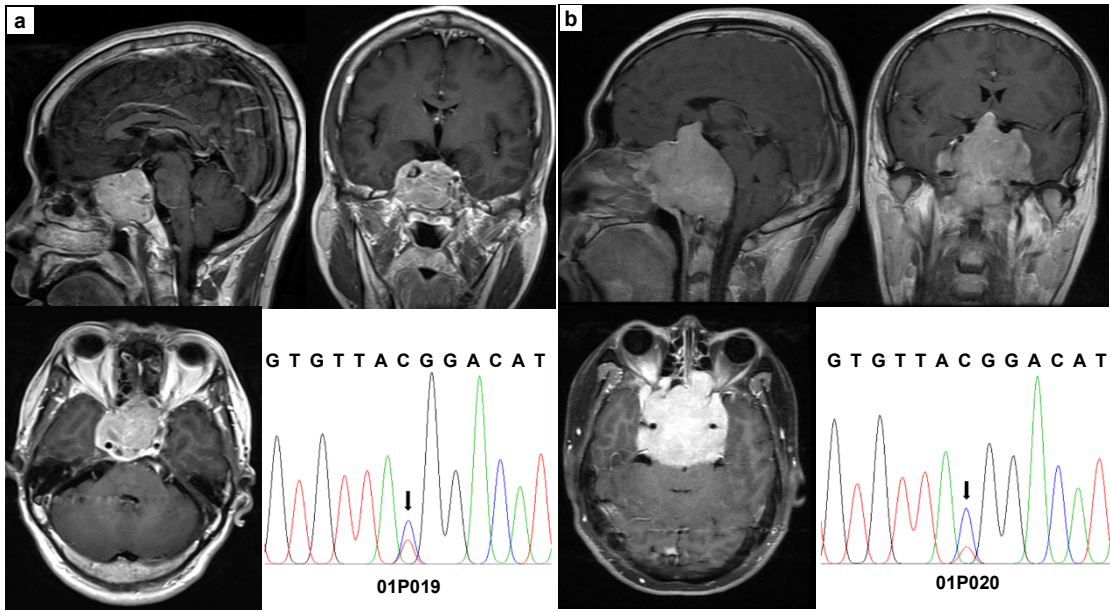

102 **Supplementary Figure 1 Two patients with *SF3B1* mutation detected from whole**  
 103 **genome sequencing.**

104 **a, b** Brain MRI of two patients with *SF3B1* mutation detected from whole genome  
 105 sequencing and validation by Sanger sequencing. Arrows indicate mutated bases.  
 106

107

108

109

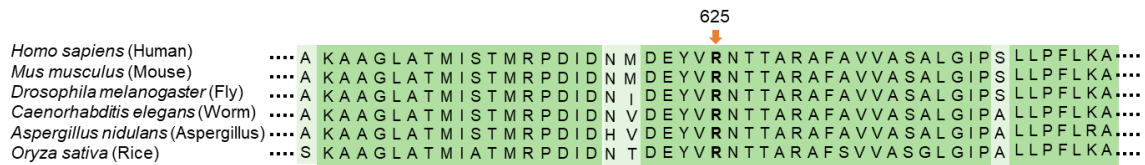

111

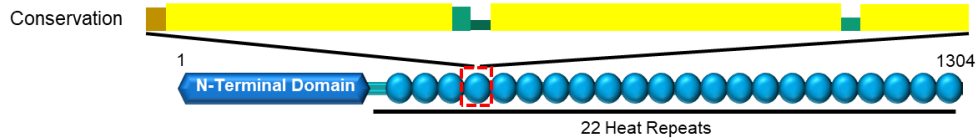

113

114 **Supplementary Figure 2 Schematic representation of the SF3B1 protein with the**  
115 **primary structural domains highlighted.**

116 R625H hotspot mutations affect the HEAT domains (Huntingtin, elongation factor 3, protein  
117 phosphatase 2A, TOR1). Protein sequence alignments of the SF3B1 C-terminal domain are  
118 around the altered residues (R625H), conserved in evolutionarily diverse species.

119

120

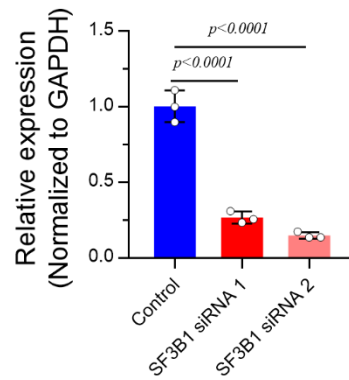

121

122 **Supplementary Figure 3 Representative qRT-PCR for SF3B1 expression levels in**  
123 **primary human prolactinoma cells transfected with control or specific SF3B1 siRNA.**

124 GAPDH was used as internal control. Results are displayed as mean  $\pm$  SD (n=3 per group).

125 The p-values by one-way ANOVA followed by Dunnett's multiple comparisons test are

126 indicated. Source data are provided as a Source Data file.

127

128

129  
130  
131  
132  
133  
134  
135  
136  
137  
138  
139  
140  
141  
142  
143  
144  
145  
146  
147  
148

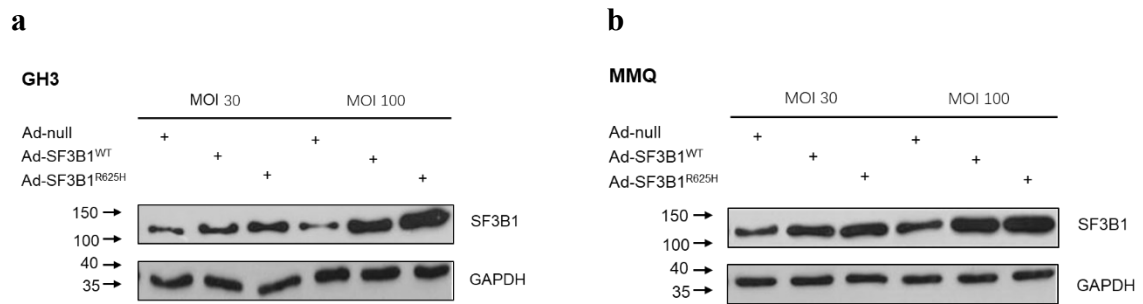

**Supplementary Figure 4 Western blot analysis of SF3B1.**

**a**, Representative western blot analysis of SF3B1 in GH3 infected with Ad-null (used as the control) or Ad-SF3B1<sup>WT</sup> or Ad-SF3B1<sup>R625H</sup> at the indicated MOI. **b**, Representative western blot analysis of SF3B1 in MMQ infected with Ad-null (used as the control) or Ad-SF3B1<sup>WT</sup> or Ad-SF3B1<sup>R625H</sup> at the indicated MOI.



149  
 150  
 151  
 152  
 153  
 154  
 155  
 156  
 157  
 158  
 159  
 160  
 161  
 162

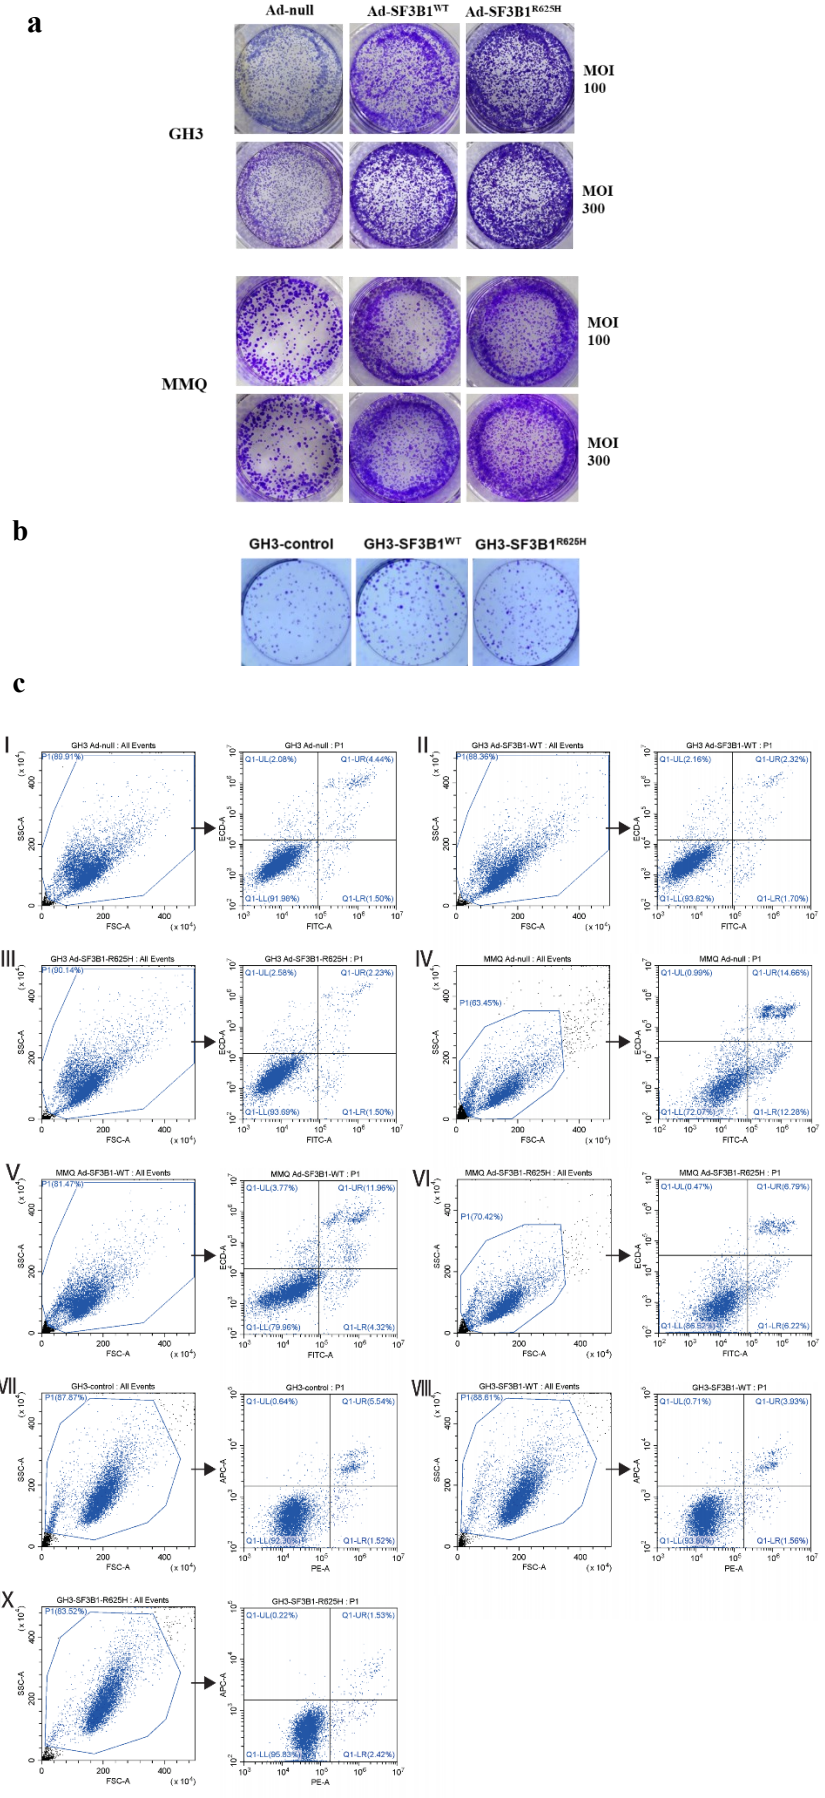

163

164 **Supplementary Figure 5 SF3B1<sup>R625H</sup> enhances proliferation and suppress apoptosis of**  
165 **GH3 and MMQ cells.**  
166 **a,** The focus formation of GH3/MMQ cells transduced with Ad-null, Ad-SF3B1<sup>WT</sup> and Ad-  
167 SF3B1<sup>R625H</sup>. **b,** The focus formation of stable GH3-control, GH3- SF3B1<sup>WT</sup>, GH3-SF3B1<sup>R625H</sup>  
168 cells. **c,** Annexin V/PI staining and flow cytometry showed the percentages of apoptosis of  
169 GH3/MMQ cells transduced with control, SF3B1<sup>WT</sup> and SF3B1<sup>R625H</sup>. I -III, Ad-GH3 cells. IV  
170 -VI, Ad-MMQ cells. VII-IX, stable GH3 cells.  
171

172  
 173  
 174  
 175  
 176  
 177  
 178  
 179  
 180  
 181  
 182  
 183  
 184  
 185  
 186  
 187  
 188  
 189  
 190  
 191  
 192

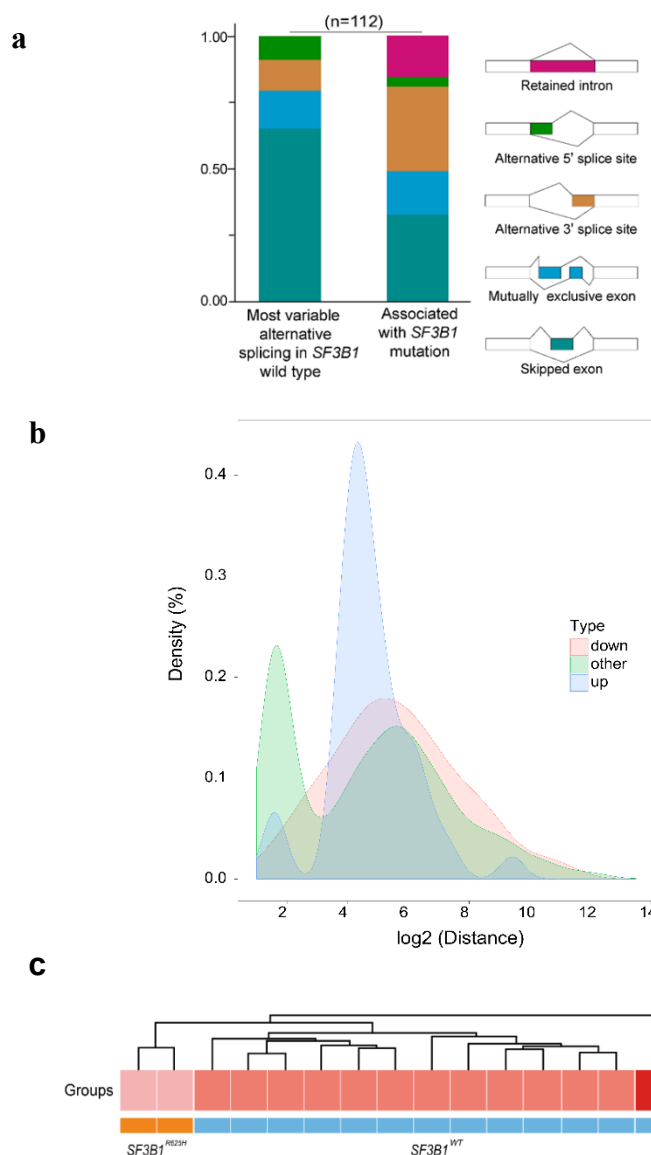

193 **Supplementary Figure 6 Alternative splicing in *SF3B1* mutant prolactinomas.**

194 **a**, Categories of 112 alternative splicing events significantly associated with *SF3B1*<sup>R625H</sup>  
 195 mutations in prolactinomas (right) compared with the 112 most variable splicing events in  
 196 *SF3B1* wild type samples (left) from RNA-seq datasets. **b**, Density plot of the relative  
 197 positions of cryptic 3'ss compared to their canonical splice sites (presented as log<sub>2</sub> of distance  
 198 between competing 3'ss) in *SF3B1* mutant tissues. Blue line: upstream cryptic sites. Red line:  
 199 downstream cryptic sites. Green line: A3SS unaffected by *SF3B1* mutations. **c**, Unsupervised  
 200 hierarchical clustering of 15 prolactinomas. Different colors of groups represent clustering  
 201 subgroups based on the most variable alternative splicing events.

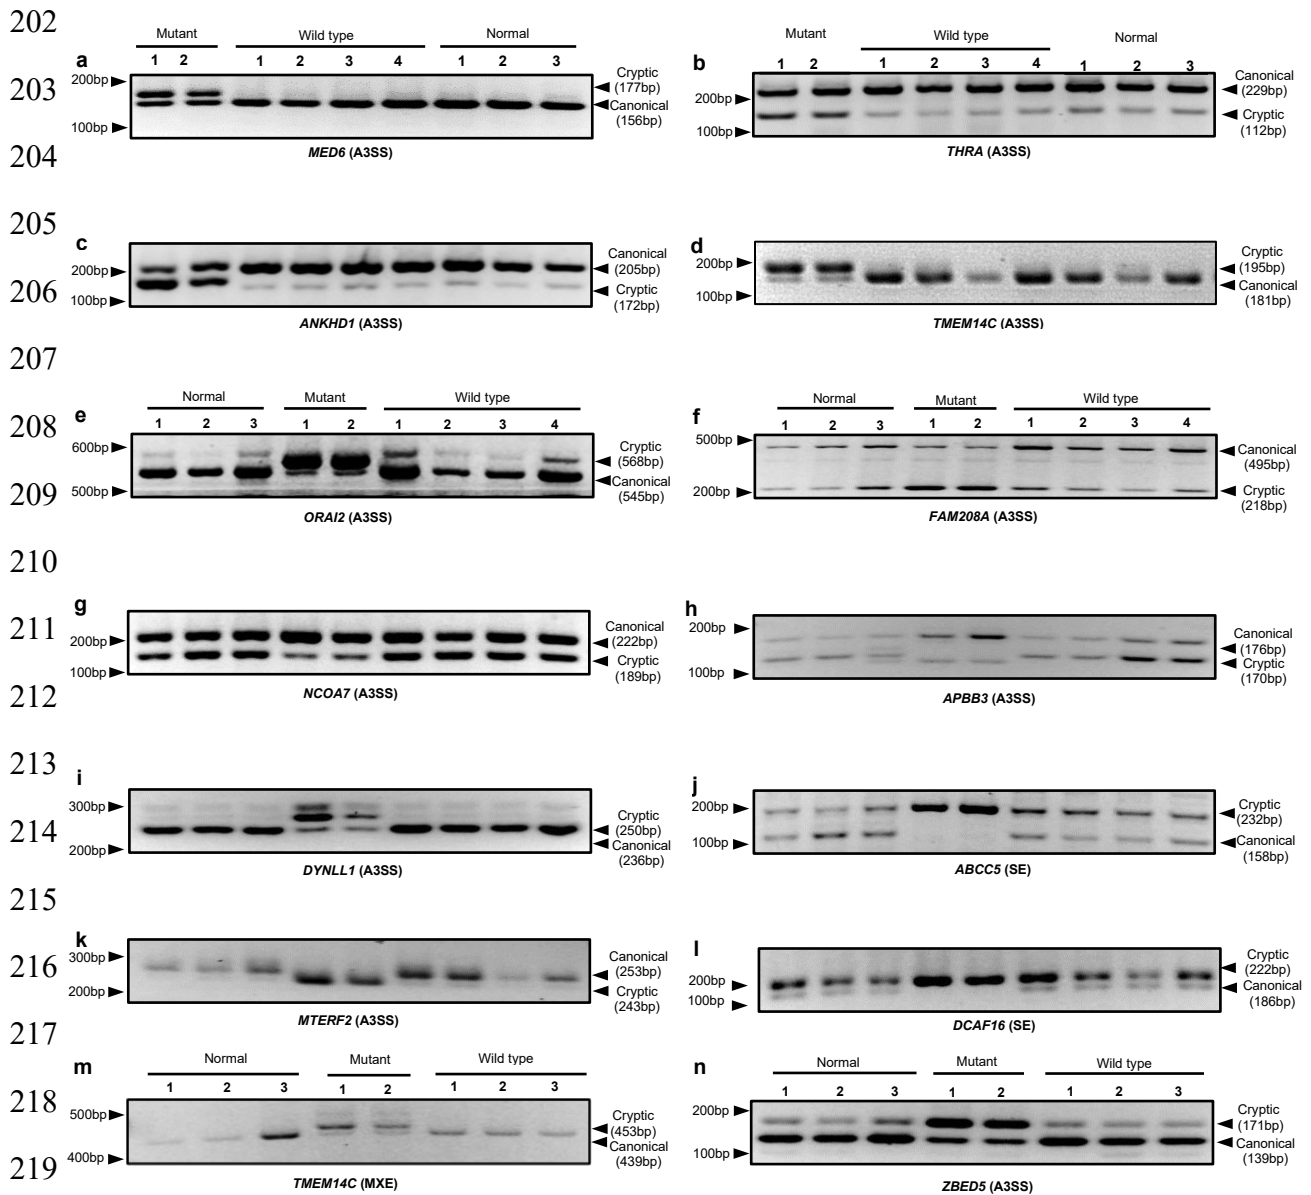

220 **Supplementary Figure 7 Alternative splicing in *SF3B1* mutant prolactinomas.**

221 **a-n**, PCR products of the 13 genes (not including *ESRRG*) – *MED6*, *THRA*, *ANKHD1*,  
 222 *TMEM14C* (A3SS), *ORAI2*, *FAM208A*, *NCOA7*, *APBB3*, *DYNLL1*, *ABCC5*, *MTERF2*,  
 223 *DCAF16*, *TMEM14C* (MXE) and *ZBED5* were amplified from *SF3B1*-mutant prolactinoma  
 224 samples (Mutant), Wild type prolactinoma samples and healthy control samples (Normal).  
 225 The cryptic and canonical transcripts were indicated by the arrow.

226

**a**

| Gene           | Motifs |
|----------------|--------|
| <i>ESRRG</i>   | 3088   |
| <i>ANKHD1</i>  | 943    |
| <i>NCOA7</i>   | 605    |
| <i>ABCC5</i>   | 414    |
| <i>FAM208A</i> | 414    |
| <i>ZBED5</i>   | 207    |
| <i>MED6</i>    | 117    |
| <i>DYNLL1</i>  | 100    |
| <i>THRA</i>    | 71     |
| <i>DCAF16</i>  | 45     |
| <i>MTERF2</i>  | 40     |
| <i>TMEM14C</i> | 14     |
| <i>APBB3</i>   | 12     |
| <i>ORAI2</i>   | 7      |

**b**

| Transcript     | Intron | Intron Ending with U2AF2 Motif | Percentage |
|----------------|--------|--------------------------------|------------|
| NM_001134285.2 | 8      | 5                              | 62.5%      |
| NM_001243505.1 | 6      | 3                              | 50.0%      |
| NM_001243506.1 | 6      | 3                              | 50.0%      |
| NM_001243507.1 | 7      | 4                              | 57.1%      |
| NM_001243509.1 | 8      | 5                              | 62.5%      |
| NM_001243510.2 | 8      | 5                              | 62.5%      |
| NM_001243511.2 | 7      | 4                              | 57.1%      |
| NM_001243512.1 | 8      | 5                              | 62.5%      |
| NM_001243513.1 | 7      | 4                              | 57.1%      |
| NM_001243514.1 | 6      | 3                              | 50.0%      |
| NM_001243515.1 | 8      | 5                              | 62.5%      |
| NM_001243518.1 | 7      | 4                              | 57.1%      |
| NM_001243519.1 | 8      | 5                              | 62.5%      |
| NM_001438.3    | 6      | 3                              | 50.0%      |
| NM_206594.2    | 8      | 5                              | 62.5%      |
| NM_206595.2    | 7      | 4                              | 57.1%      |

**c**

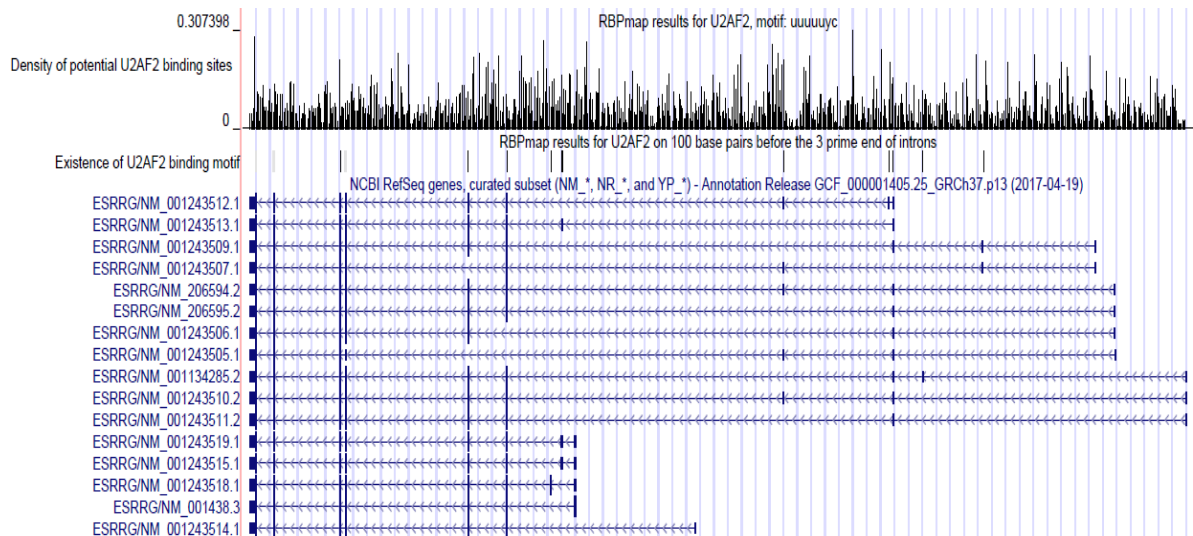

229  
230  
231

**d**

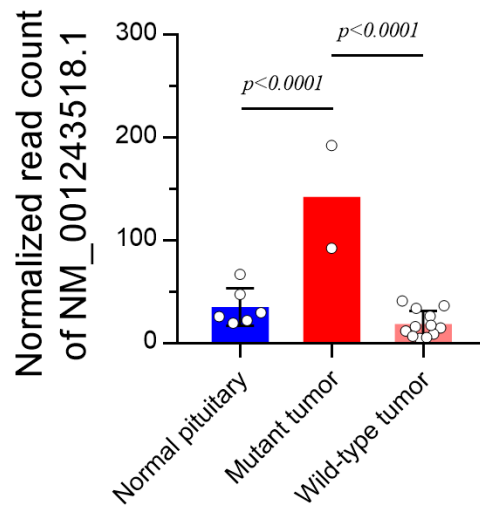

232  
233  
234

**e**

| Transcript     | Wild type vs Normal |                     |         |       | Mutant vs Normal |                     |         |       |
|----------------|---------------------|---------------------|---------|-------|------------------|---------------------|---------|-------|
|                | Base Mean           | Log <sub>2</sub> FC | P Value | P Adj | Base Mean        | Log <sub>2</sub> FC | P Value | P Adj |
| NM_001134285.2 | 169.399             | -0.444              | 0.027   | 0.128 | 230.203          | -0.010              | 0.966   | 0.990 |
| NM_001243505.1 | 8.136               | -0.813              | 0.296   | 0.562 | 15.964           | 0.984               | 0.682   | 0.897 |
| NM_001243506.1 | 0.294               | 1.506               | 0.640   | -     | 0.000            | -                   | -       | -     |
| NM_001243507.1 | 14.470              | 3.519               | 0.000   | 0.002 | 8.892            | 3.880               | 0.232   | 0.541 |
| NM_001243509.1 | 42.568              | -0.046              | 0.937   | 0.976 | 54.014           | 0.522               | 0.699   | 0.904 |
| NM_001243510.2 | 0.000               | -                   | -       | -     | 0.000            | -                   | -       | -     |
| NM_001243511.2 | 0.000               | -                   | -       | -     | 0.000            | -                   | -       | -     |
| NM_001243512.1 | 8.930               | -0.565              | 0.676   | 0.853 | 15.590           | 0.914               | 0.687   | 0.899 |
| NM_001243513.1 | 14.120              | -1.153              | 0.051   | 0.192 | 24.859           | -0.011              | 0.988   | 0.996 |
| NM_001243514.1 | 23.419              | -0.035              | 0.954   | 0.983 | 35.173           | 1.187               | 0.102   | 0.328 |
| NM_001243515.1 | 13.313              | -1.374              | 0.200   | 0.447 | 24.522           | -0.179              | 0.901   | 0.973 |
| NM_001243518.1 | 23.787              | -0.913              | 0.058   | 0.209 | 68.218           | 2.014               | 0.001   | 0.014 |
| NM_001243519.1 | 16.355              | 0.476               | 0.521   | 0.754 | 17.576           | 0.870               | 0.516   | 0.809 |
| NM_001438.3    | 40.861              | -1.694              | 0.198   | 0.445 | 86.538           | 0.111               | 0.842   | 0.955 |
| NM_206594.2    | 79.812              | -0.223              | 0.620   | 0.820 | 108.824          | 0.483               | 0.428   | 0.744 |
| NM_206595.2    | 15.310              | -0.486              | 0.554   | 0.775 | 37.607           | 2.033               | 0.230   | 0.539 |

235 FC, Fold change; P Adj, Adjusted p value

236  
237

238 **Supplementary Figure 8 The alternative splicing of ESRRG in prolactinomas with or**  
239 **without *SF3B1* mutation.**

240 **a**, The count of U2AF2 binding motifs recognized in the 15 proven alternatively splicing  
241 events of 14 genes. **b**, The count of introns containing the U2AF2 binding motifs on the last  
242 100bp at the 3' ends in each transcript of ESRRG. Over half of the annotated introns are

243 ending with the U2AF2 binding motif, which indicates that the known splicing of ESRRG  
244 would be more likely impacted by the U2 snRNP complex. **c**, The first row of the figure  
245 represents the distribution of the density of the U2AF2 binding motifs. The density is defined  
246 as the proportion of 7-bp-long (i.e. the length of the U2AF2 binding motif) subsequences that  
247 can be recognized by the U2AF2 binding motifs to all 7-bp-long subsequences on the  
248 corresponding genome region. The enriched binding motifs on the entire gene body of  
249 ESRRG indicate that there would be more abnormal unknown splicing events caused by the  
250 U2 snRNP complex on ESRRG. The second row is the existence of the U2AF2 binding motif  
251 on the last 100bp at the 3' ends of introns. The last few rows are the transcripts annotated in  
252 the RefSeq database. **d**, The transcript-level differential expression analysis of cryptic  
253 ESRRG from RNA-Seq data (Normal pituitary n=6, Mutant tumor n=2 and Wild type tumor  
254 n=12). Results are given as mean  $\pm$  SD. The p-values by one-way ANOVA followed by  
255 Tukey's multiple comparisons post hoc test are indicated. **e**, The intergroup expression levels  
256 of the cryptic ESRRG transcript (NM\_001243518.1). ESRRG expression from RNA-seq data  
257 in normal pituitaries, prolactinoma samples with mutant or wild type *SF3B1*. Source data are  
258 provided as a Source Data file.  
259

260

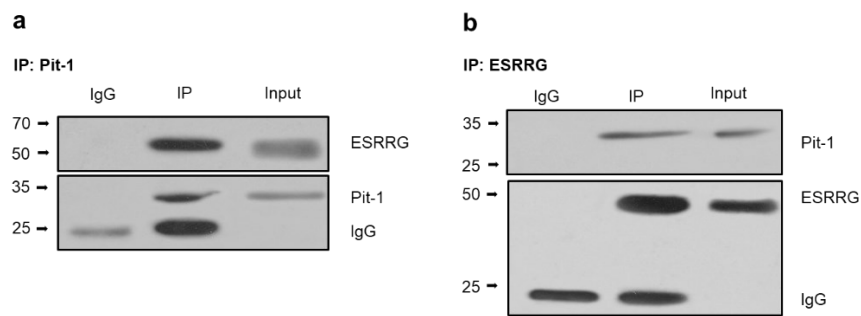

261

262

263 **Supplementary Figure 9 Interaction of Pit-1 and ESRRG in prolactinomas.**

264 **a**, ESRRG specific antibody recognized the complex immunoprecipitated by Pit-1

265 specific antibody but did not recognize normal IgG. **b**, The Pit-1 specific antibody

266 recognized the complex immunoprecipitated by ESRRG specific antibody but did not

267 recognize normal IgG.

268

269

270

271

272

273

274

275

276

277

278



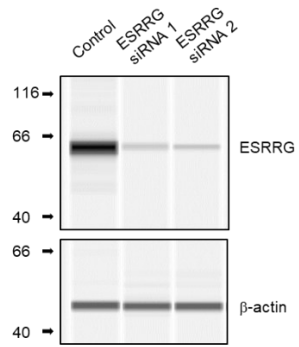

279

280 **Supplementary Figure 10 Representative western blot for ESRRG expression levels in**  
281 **primary human prolactinoma cells transfected with control or specific ESRRG siRNA.**

282  $\beta$ -actin was used as an internal control.

283

284  
285  
286  
287  
288  
289  
290  
291  
292  
293  
294  
295

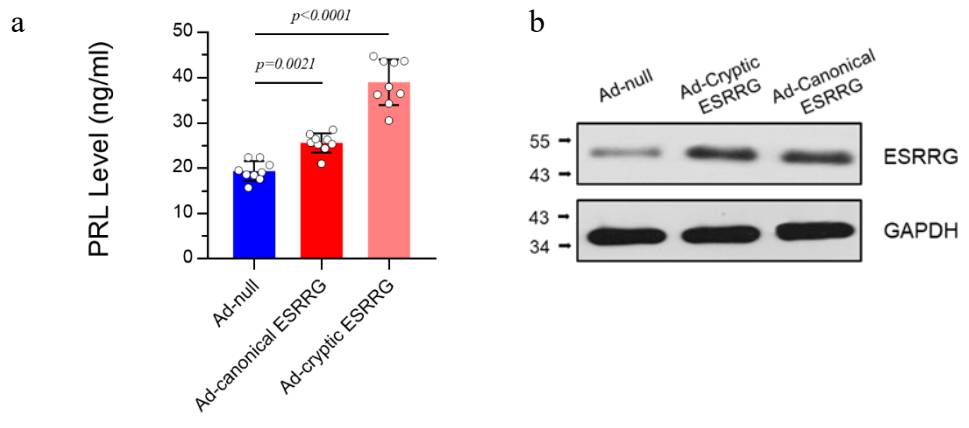

**Supplementary Figure 11 Representative PRL secretion (a, n=9 per group) and western blot (b) for ESRRG expression levels in primary human prolactinoma cells transfected with Ad-null, Ad- canonical ESRRG and cryptic ESRRG are shown respectively. Results are expressed as mean ± SD. The p-values by one-way ANOVA followed by Tukey's multiple comparisons post hoc test are indicated. Source data are provided as a Source Data file.**

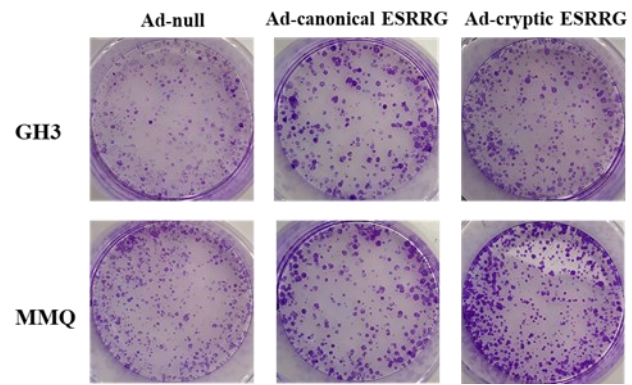

296

297 **Supplementary Figure 12 Focus formations assay.**

298 The focus formation of GH3/MMQ cells transduced with Ad-null, Ad-canonical ESRRG and

299 Ad-cryptic ESRRG.

300

301

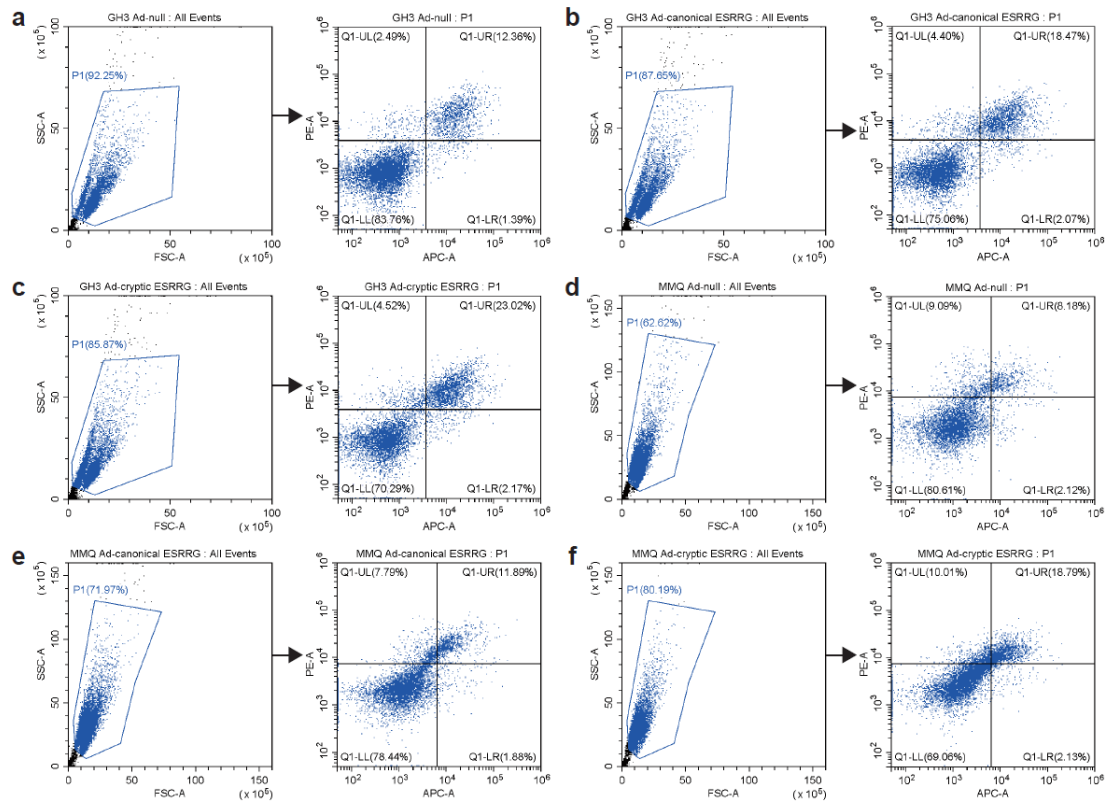

303

304

**Supplementary Figure 13** The gating strategy for flow cytometry of Fig. 6g, h. Annexin

305

V/PI staining and flow cytometry showed the percentages of apoptosis of GH3/MMQ cells

306

transduced with Ad-null, Ad-canonical ESRRG and Ad-cryptic ESRRG. a-c, GH3 cells. d-f,

307

MMQ cells.

**Supplementary Table 1 Overview on the patients included in this study and summary of *SF3B1*<sup>R625H</sup>**

**mutational status of these patients**

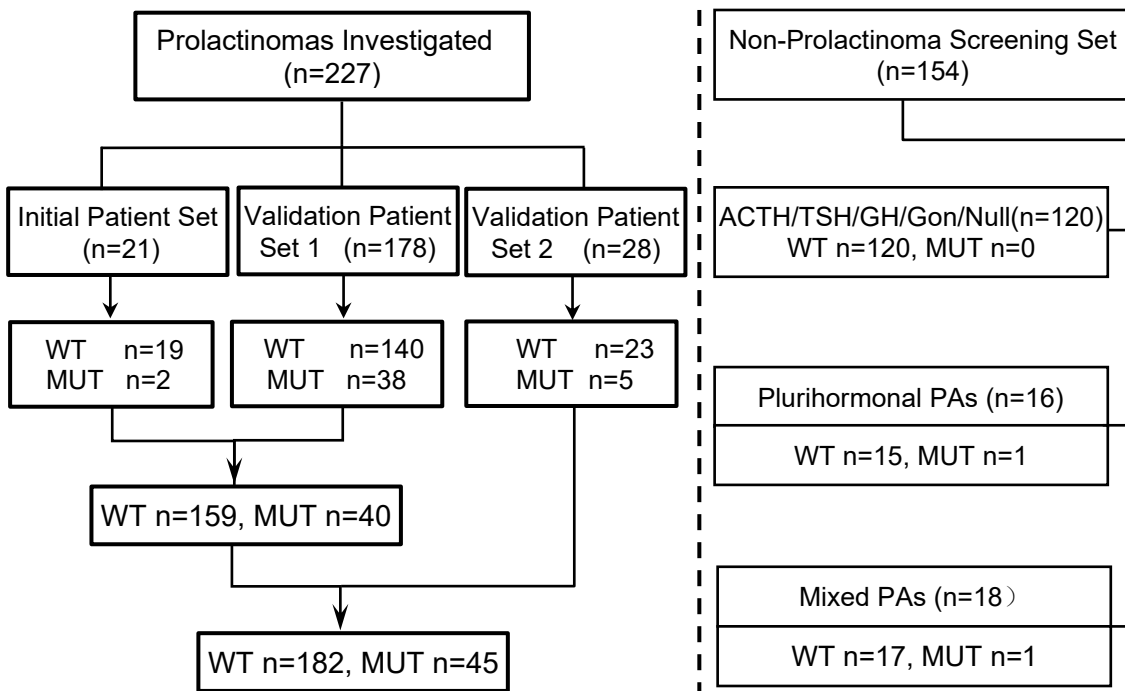

PA, Pituitary adenoma; WT, Wild type; MUT, Mutant; GH, Somatotroph adenoma; ACTH, Corticotroph adenoma; TSH, Thyrotroph adenoma; Gon, Gonadotroph adenoma; Null, Null cell adenoma; Mixed PAs, Mammotroph/mixed somatotroph and lactotroph adenoma.

**Supplementary Table 2 The mutations found in 21 patients with prolactinoma by whole genome sequencing (confirmed by Sanger sequencing or Time of Flight Mass Spectrometer (TOF)).**

| Gene           | Sample | Chr | Position  | Ref | Alt | Mutation Type | Transcript   | Exon   | CDS Level | Protein Level |
|----------------|--------|-----|-----------|-----|-----|---------------|--------------|--------|-----------|---------------|
| <i>ACPP</i>    | 01P020 | 3   | 132051078 | A   | G   | Missense      | NM_001099    | exon4  | c.G346A   | p.A116T       |
| <i>ACTL6B</i>  | 02P016 | 7   | 100253445 | T   | G   | Missense      | NM_016188    | exon2  | c.C83A    | p.A28D        |
| <i>ADAMTS4</i> | 01P020 | 1   | 161168182 | A   | G   | Missense      | NM_005099    | exon1  | c.C236T   | p.A79V        |
| <i>AGTR1</i>   | 01P020 | 3   | 148459581 | A   | G   | Nonsense      | NM_009585    | exon2  | c.G759A   | p.W253X       |
| <i>ALPK2</i>   | 01P017 | 18  | 56246261  | A   | T   | Missense      | NM_052947    | exon4  | c.A1747T  | p.T583S       |
| <i>CCDC65</i>  | 01P020 | 12  | 49312558  | C   | G   | Missense      | NM_001286957 | exon6  | c.G469C   | p.V157L       |
| <i>CENPN</i>   | 01P020 | 16  | 81061783  | C   | T   | Missense      | NM_001270473 | exon9  | c.C758T   | p.T253M       |
| <i>DHX33</i>   | 02P022 | 17  | 5372124   | A   | G   | Missense      | NM_020162    | exon1  | c.C56T    | p.P19L        |
| <i>DNAH6</i>   | 02P015 | 2   | 84913611  | A   | T   | Missense      | NM_001370    | exon44 | c.A7067T  | p.K2356I      |
| <i>DOPEY1</i>  | 01P020 | 6   | 83869655  | C   | G   | Missense      | NM_001199942 | exon37 | c.C6911G  | p.S2304C      |
| <i>EXOC8</i>   | 01P019 | 1   | 231471445 | C   | T   | Missense      | NM_175876    | exon1  | c.G2047A  | p.E683K       |
| <i>FAM162A</i> | 01P020 | 3   | 122121654 | A   | C   | Missense      | NM_014367    | exon2  | c.C82A    | p.L28I        |
| <i>GALNT9</i>  | 01P020 | 12  | 132862879 | A   | G   | Missense      | NM_001122636 | exon2  | c.C376T   | p.R126C       |
| <i>GRB2</i>    | 02P023 | 17  | 73322052  | C   | T   | Missense      | NM_002086    | exon4  | c.A226G   | p.K76E        |
| <i>HSPA4L</i>  | 01P019 | 4   | 128725218 | A   | T   | Missense      | NM_014278    | exon8  | c.T961A   | p.L321I       |
| <i>INCENP</i>  | 01P017 | 11  | 61897801  | A   | G   | Missense      | NM_001040694 | exon4  | c.G802A   | p.D268N       |
| <i>LOXL4</i>   | 01P020 | 10  | 100017852 | A   | G   | Nonsense      | NM_032211    | exon7  | c.C991T   | p.Q331X       |
| <i>MCM3AP</i>  | 02P016 | 21  | 47664916  | C   | T   | Missense      | NM_003906    | exon23 | c.G4843A  | p.V1615M      |
| <i>MPC2</i>    | 01P019 | 1   | 167893758 | A   | C   | Missense      | NM_001143674 | exon3  | c.T127G   | p.F43V        |
| <i>MRC2</i>    | 01P020 | 17  | 60757231  | T   | G   | Missense      | NM_006039    | exon14 | c.G2266T  | p.G756C       |
| <i>MTMR12</i>  | 01P020 | 5   | 32312869  | A   | G   | Missense      | NM_001040446 | exon1  | c.C76T    | p.P26S        |
| <i>MYO9A</i>   | 01P020 | 15  | 72141257  | A   | T   | Nonsense      | NM_006901    | exon39 | c.A6766T  | p.K2256X      |
| <i>ORAI2</i>   | 01P027 | 7   | 102079487 | C   | G   | Missense      | NM_032831    | exon2  | c.C84G    | p.D28E        |
| <i>PDE4C</i>   | 01P020 | 19  | 18331123  | A   | G   | Missense      | NM_001098818 | exon7  | c.C619T   | p.R207W       |
| <i>PDHX</i>    | 02P023 | 11  | 34938233  | C   | T   | Missense      | NM_001166158 | exon1  | c.C31T    | p.P11S        |
| <i>PDPR</i>    | 01P019 | 16  | 70154480  | A   | G   | Missense      | NM_017990    | exon3  | c.A85G    | p.T29A        |
| <i>PHLPP1</i>  | 01P020 | 18  | 60383748  | T   | G   | Missense      | NM_194449    | exon1  | c.G832T   | p.D278Y       |

|                 |            |    |               |   |   |                |                  |        |             |              |
|-----------------|------------|----|---------------|---|---|----------------|------------------|--------|-------------|--------------|
| <i>PRRC2C</i>   | 01P01<br>7 | 1  | 17151466<br>5 | A | G | Missense       | NM_015172        | exon17 | c.A4805G    | p.N1602<br>S |
| <i>PZP</i>      | 01P02<br>7 | 12 | 9317778       | A | G | Missense       | NM_002864        | exon19 | c.C2444T    | p.T815I      |
| <i>RIPK4</i>    | 01P02<br>0 | 21 | 43161434      | A | G | Missense       | NM_020639        | exon8  | c.C1919T    | p.P640L      |
| <i>RNF20</i>    | 02P02<br>3 | 9  | 10432349<br>9 | C | T | Missense       | NM_019592        | exon18 | c.T2636C    | p.F879S      |
| <i>RYR3</i>     | 01P02<br>0 | 15 | 33873770      | A | G | Missense       | NM_001036        | exon14 | c.A1499G    | p.H500R      |
| <i>SATB2</i>    | 02P01<br>5 | 2  | 20029821<br>6 | A | C | Missense       | NM_00117250<br>9 | exon3  | c.G191T     | p.C64F       |
| <i>SF3B1</i>    | 01P01<br>9 | 2  | 19826748<br>3 | C | T | Missense       | NM_012433        | exon14 | c.G1874A    | p.R625H      |
| <i>SF3B1</i>    | 01P02<br>0 | 2  | 19826748<br>3 | C | T | Missense       | NM_012433        | exon14 | c.G1874A    | p.R625H      |
| <i>SH2D3C</i>   | 02P01<br>5 | 9  | 13050264<br>8 | C | T | Missense       | NM_00114253<br>3 | exon8  | c.A1615G    | p.I539V      |
| <i>SREBF2</i>   | 01P02<br>0 | 22 | 42264687      | A | T | Missense       | NM_004599        | exon3  | c.A611T     | p.Q204L      |
| <i>THBD</i>     | 02P01<br>5 | 20 | 23029341      | C | G | Missense       | NM_000361        | exon1  | c.C801G     | p.C267W      |
| <i>TRIM35</i>   | 01P02<br>0 | 8  | 27146786      | A | G | Missense       | NM_171982        | exon5  | c.C797T     | p.T266I      |
| <i>UBR2</i>     | 02P01<br>5 | 6  | 42641573      | T | G | Missense       | NM_015255        | exon37 | c.G4131T    | p.W1377<br>C |
| <i>ZNF695</i>   | 01P02<br>8 | 1  | 24715087<br>6 | C | T | Missense       | NM_020394        | exon4  | c.A941G     | p.H314R      |
| <i>ZNF804B</i>  | 02P01<br>5 | 7  | 88962838      | A | T | Missense       | NM_181646        | exon4  | c.A542T     | p.Q181L      |
| <i>ACAP3</i>    | 01P00<br>4 | 1  | 1233201       | C | T | Splice<br>Site | NM_030649        | exon15 | c.1128+1G>A |              |
| <i>ADRM1</i>    | 01P02<br>8 | 20 | 60883079      | G | A | Missense       | NM_00128143<br>7 | exon7  | c.G742A     | p.D248N      |
| <i>C19orf22</i> | 01P00<br>6 | 19 | 900919        | C | A | Nonsens<br>e   | NM_138774        | exon4  | c.G385T     | p.E129X      |
| <i>CARM1</i>    | 01P00<br>6 | 19 | 11031545      | C | A | Missense       | NM_199141        | exon13 | c.C1460A    | p.S487Y      |
| <i>CCDC42B</i>  | 01P00<br>2 | 12 | 11359066<br>3 | T | A | Missense       | NM_00114487<br>2 | exon3  | c.T238A     | p.S80T       |
| <i>CDH1</i>     | 01P00<br>5 | 16 | 68867194      | A | G | Missense       | NM_004360        | exon16 | c.A2441G    | p.N814S      |
| <i>CHI3L2</i>   | 01P00<br>1 | 1  | 11177763<br>8 | C | A | Missense       | NM_00102519<br>7 | exon4  | c.C409A     | p.P137T      |
| <i>DHRS7C</i>   | 01P00<br>8 | 17 | 9674885       | T | G | Missense       | NM_00110557<br>1 | exon6  | c.C856A     | p.R286S      |
| <i>DMXL2</i>    | 01P00<br>4 | 15 | 51763600      | T | C | Splice<br>Site | NM_00117411<br>6 | exon30 | c.7214-2A>G |              |
| <i>DOPEY1</i>   | 01P02<br>0 | 6  | 83869655      | C | G | Missense       | NM_00119994<br>2 | exon37 | c.C6911G    | p.S2304<br>C |
| <i>DYSF</i>     | 01P00<br>6 | 2  | 71839775      | T | C | Missense       | NM_00113097<br>6 | exon38 | c.T4130C    | p.L1377P     |
| <i>ECE1</i>     | 01P00<br>5 | 1  | 21616613      | C | T | Missense       | NM_00111334<br>9 | exon1  | c.A80C      | p.D27A       |
| <i>ECE1</i>     | 01P00<br>5 | 1  | 21616612      | T | G | Missense       | NM_00111334<br>9 | exon1  | c.G79A      | p.D27N       |
| <i>ETFB</i>     | 01P00<br>3 | 19 | 51856529      | C | T | Missense       | NM_00101476<br>3 | exon2  | c.G505A     | p.A169T      |
| <i>EXOC8</i>    | 01P01<br>9 | 1  | 23147144<br>5 | C | T | Missense       | NM_175876        | exon1  | c.G2047A    | p.E683K      |

|                      |            |    |               |   |   |                |                  |        |               |          |
|----------------------|------------|----|---------------|---|---|----------------|------------------|--------|---------------|----------|
| <i>FAM177B</i>       | 01P00<br>6 | 1  | 22291997<br>8 | G | A | Missense       | NM_207468        | exon3  | c.G91A        | p.G31R   |
| <i>G6PC2</i>         | 01P01<br>7 | 2  | 16976436<br>3 | A | G | Missense       | NM_021176        | exon5  | c.G842A       | p.S281N  |
| <i>GMNC</i>          | 01P00<br>8 | 3  | 19057333<br>7 | T | G | Missense       | NM_00114668<br>6 | exon5  | c.C752A       | p.T251N  |
| <i>HPSE2</i>         | 02P01<br>5 | 10 | 10090414<br>2 | C | T | Missense       | NM_00116624<br>4 | exon3  | c.G463A       | p.D155N  |
| <i>HYDIN</i>         | 01P00<br>8 | 16 | 71022295      | C | T | Splice<br>Site | NM_00127097<br>4 | exon27 | c.3984+1G>A   |          |
| <i>KIF2B</i>         | 02P02<br>3 | 17 | 51900887      | C | T | Missense       | NM_032559        | exon1  | c.C493T       | p.R165W  |
| <i>MDN1</i>          | 01P00<br>5 | 6  | 90368513      | C | G | Missense       | NM_014611        | exon89 | c.G14837<br>C | p.S4946T |
| <i>MECOM</i>         | 01P00<br>9 | 3  | 16881298<br>6 | C | T | Missense       | NM_00116399<br>9 | exon11 | c.G2309A      | p.R770K  |
| <i>MPDZ</i>          | 01P00<br>3 | 9  | 13140147      | G | A | Missense       | NM_00126140<br>6 | exon27 | c.C3743T      | p.A1248V |
| <i>NOTCH2N<br/>L</i> | 01P00<br>3 | 1  | 14524889<br>5 | G | A | Splice<br>Site | NM_203458        | exon2  | c.38+1G>A     |          |
| <i>NUP54</i>         | 01P01<br>7 | 4  | 77051886      | C | T | Missense       | NM_00127860<br>3 | exon7  | c.A835G       | p.M279V  |
| <i>OR5AN1</i>        | 01P00<br>3 | 11 | 59132719      | C | T | Missense       | NM_00100472<br>9 | exon1  | c.C788T       | p.S263F  |
| <i>ORAI2</i>         | 01P02<br>7 | 7  | 10207948<br>7 | C | G | Missense       | NM_032831        | exon2  | c.C84G        | p.D28E   |
| <i>PAQR5</i>         | 01P01<br>2 | 15 | 69692338      | A | C | Missense       | NM_00110455<br>4 | exon8  | c.C635A       | p.A212E  |
| <i>PCNXL2</i>        | 01P00<br>9 | 1  | 23339426<br>9 | C | T | Missense       | NM_014801        | exon5  | c.G1339A      | p.E447K  |
| <i>PITHD1</i>        | 01P01<br>7 | 1  | 24105953      | A | G | Missense       | NM_020362        | exon2  | c.A224G       | p.E75G   |
| <i>RBL1</i>          | 02P02<br>3 | 20 | 35689594      | A | C | Missense       | NM_002895        | exon9  | c.G1162T      | p.A388S  |
| <i>SACS</i>          | 01P00<br>3 | 13 | 23905003      | G | A | Missense       | NM_00127805<br>5 | exon8  | c.C12571<br>T | p.P4191S |
| <i>SPAG9</i>         | 01P00<br>8 | 17 | 49082626      | C | T | Splice<br>Site | NM_00113052<br>7 | exon12 | c.1383-2A>G   |          |
| <i>SREBF2</i>        | 01P02<br>0 | 22 | 42264687      | A | T | Missense       | NM_004599        | exon3  | c.A611T       | p.Q204L  |
| <i>STIP1</i>         | 02P02<br>3 | 11 | 63964765      | A | G | Missense       | NM_00128265<br>2 | exon6  | c.G836A       | p.G279E  |
| <i>TERF2</i>         | 01P02<br>7 | 16 | 69419359      | C | T | Missense       | NM_005652        | exon2  | c.A410G       | p.H137R  |
| <i>THBD</i>          | 02P01<br>5 | 20 | 23029341      | G | C | Missense       | NM_000361        | exon1  | c.C801G       | p.C267W  |
| <i>TUSC5</i>         | 01P00<br>6 | 17 | 1198818       | G | A | Missense       | NM_172367        | exon2  | c.G421A       | p.G141S  |
| <i>UNC13C</i>        | 01P01<br>2 | 15 | 54306248      | A | C | Missense       | NM_00108053<br>4 | exon1  | c.C1148A      | p.T383N  |
| <i>VCX</i>           | 01P01<br>2 | X  | 7811584       | C | T | Missense       | NM_013452        | exon3  | c.C148T       | p.R50C   |
| <i>WDFY3</i>         | 01P00<br>1 | 4  | 85674885      | C | T | Missense       | NM_014991        | exon35 | c.G5704A      | p.V1902I |
| <i>YARS</i>          | 02P01<br>5 | 1  | 33263369      | T | C | Missense       | NM_003680        | exon5  | c.G586A       | p.E196K  |
| <i>YTHDC1</i>        | 01P00<br>9 | 4  | 69195940      | A | C | Missense       | NM_133370        | exon7  | c.G1157T      | p.R386I  |
| <i>ZDBF2</i>         | 01P00<br>2 | 2  | 20717382<br>5 | G | T | Missense       | NM_020923        | exon5  | c.G4573T      | p.V1525L |



|               |            |    |               |   |   |          |                  |       |         |         |
|---------------|------------|----|---------------|---|---|----------|------------------|-------|---------|---------|
| <i>ZNF407</i> | 01P01<br>9 | 18 | 72343166      | T | A | Missense | NM_00114618<br>9 | exon1 | c.T191A | p.I64K  |
| <i>ZNF687</i> | 01P02<br>7 | 1  | 15125975<br>9 | G | A | Missense | NM_020832        | exon2 | c.G992A | p.R331Q |
| <i>ZYX</i>    | 01P00<br>3 | 7  | 14307886<br>7 | C | T | Missense | NM_00101097<br>2 | exon2 | c.C203T | p.P68L  |

Chr, Chromosome; Ref, Reference; Alt, Alteration; CDS, Coding sequence

**Supplementary Table 3** The summary of somatic variants of *SF3B1*<sup>R625H</sup> detected by digital PCR in pituitary adenoma samples.

| Patient       | WT  | Mut | FA (%) | WT       | Mut  | FA (%)     | WT  | Mut | FA (%) | WT       | Mut  | FA (%)     | Tumor Type |
|---------------|-----|-----|--------|----------|------|------------|-----|-----|--------|----------|------|------------|------------|
| <b>01P019</b> | 255 | 194 | 76.08  | 575      | 481  | 83.65      | 994 | 592 | 59.56  | 927      | 588  | 63.43      | PRL        |
|               | 885 | 603 | 68.14  | 195      | 190  | 97.44      | 172 | 111 | 64.53  | 86       | 68   | 79.07      |            |
|               | 44  | 26  | 59.09  | 35       | 14   | 40         | 311 | 205 | 65.92  | 146<br>7 | 2327 | 158.6<br>2 |            |
|               | 291 | 158 | 54.3   | 145<br>4 | 1933 | 132.9<br>4 | 295 | 167 | 56.61  | 347      | 176  | 50.72      |            |
|               | 751 | 463 | 61.65  | 305      | 163  | 53.44      | 271 | 160 | 59.04  | 305      | 153  | 50.16      |            |
|               | 259 | 163 | 62.93  | 885      | 526  | 59.44      | 222 | 125 | 56.31  |          |      |            |            |
| <b>01P020</b> | 236 | 119 | 50.42  | 119<br>4 | 441  | 36.93      | 911 | 394 | 43.25  | 103<br>5 | 474  | 45.8       | PRL        |
|               | 800 | 252 | 31.5   | 69       | 34   | 49.28      | 153 | 78  | 50.98  | 76       | 41   | 53.95      |            |
|               | 34  | 13  | 38.24  | 20       | 8    | 40         | 324 | 139 | 42.9   | 77       | 34   | 44.16      |            |
|               | 239 | 80  | 33.47  | 294      | 126  | 42.86      | 316 | 120 | 37.97  | 282      | 129  | 45.74      |            |
|               | 214 | 104 | 48.6   | 308      | 129  | 41.88      | 847 | 363 | 42.86  | 471      | 228  | 48.41      |            |
|               | 228 | 96  | 42.11  | 222      | 100  | 45.05      | 237 | 116 | 48.95  | 288      | 90   | 31.25      |            |
|               | 298 | 101 | 33.89  | 635      | 352  | 55.43      | 233 | 108 | 46.35  | 291      | 131  | 45.02      |            |
| <b>02P157</b> | 57  | 3   | 5.26   | 23       | 0    | 0          | 21  | 1   | 4.76   | 68       | 1    | 1.47       | PRL        |
| <b>02P161</b> | 52  | 3   | 5.77   | 59       | 46   | 77.97      | 98  | 4   | 4.08   |          |      |            | PRL        |
| <b>02P163</b> | 50  | 1   | 2      | 40       | 0    | 0          | 53  | 1   | 1.89   | 51       | 1    | 1.96       | PRL        |
| <b>02P193</b> | 489 | 53  | 10.84  | 103<br>9 | 5    | 0.48       | 155 | 18  | 11.61  | 165      | 58   | 35.15      | PRL        |
|               | 169 | 24  | 14.2   |          |      |            |     |     |        |          |      |            |            |
| <b>02P242</b> | 124 | 1   | 0.81   | 246      | 8    | 3.25       | 250 | 4   | 1.6    |          |      |            | PRL        |
| <b>02P249</b> | 87  | 5   | 5.75   | 31       | 0    | 0          | 24  | 1   | 4.17   | 21       | 1    | 4.76       | PRL        |
|               | 45  | 2   | 4.44   |          |      |            |     |     |        |          |      |            |            |
| <b>01P043</b> | 32  | 0   | 0      | 40       | 1    | 2.5        | 54  | 2   | 3.7    | 72       | 1    | 1.39       | PRL        |
|               | 59  | 1   | 1.69   |          |      |            |     |     |        |          |      |            |            |
| <b>01P059</b> | 138 | 0   | 0      | 32       | 1    | 3.13       | 156 | 2   | 1.28   | 87       | 2    | 2.3        | PRL        |
|               | 50  | 1   | 2      |          |      |            |     |     |        |          |      |            |            |
| <b>01P060</b> | 30  | 6   | 20     | 57       | 0    | 0          | 175 | 4   | 2.29   | 217      | 2    | 0.92       | PRL        |
| <b>01P061</b> | 21  | 1   | 4.76   | 65       | 1    | 1.54       | 42  | 1   | 2.38   |          |      |            | PRL        |
| <b>01P063</b> | 453 | 6   | 1.32   | 411      | 5    | 1.22       | 648 | 6   | 0.93   |          |      |            | PRL        |
| <b>01P074</b> | 310 | 18  | 5.81   | 387      | 47   | 12.14      | 266 | 31  | 11.65  | 276      | 40   | 14.49      | PRL        |
| <b>01P076</b> | 358 | 4   | 1.12   | 205      | 1    | 0.49       | 364 | 2   | 0.55   | 105      | 1    | 0.95       | PRL        |
|               | 134 | 1   | 0.75   |          |      |            |     |     |        |          |      |            |            |
| <b>01P083</b> | 213 | 4   | 1.88   | 75       | 3    | 4          | 196 | 2   | 1.02   |          |      |            | PRL        |
| <b>01P084</b> | 230 | 3   | 1.3    | 185      | 3    | 1.62       | 289 | 2   | 0.69   |          |      |            | PRL        |
| <b>01P086</b> | 135 | 3   | 2.22   | 88       | 2    | 2.27       | 116 | 2   | 1.72   |          |      |            | PRL        |
| <b>07P090</b> | 327 | 4   | 1.22   | 39       | 1    | 2.56       | 256 | 4   | 1.56   |          |      |            | PRL        |
| <b>01P091</b> | 285 | 5   | 1.75   | 88       | 2    | 2.27       | 306 | 7   | 2.29   |          |      |            | PRL        |
| <b>01P099</b> | 96  | 1   | 1.04   | 91       | 43   | 47.25      | 99  | 1   | 1.01   | 352      | 4    | 1.14       | PRL        |
|               | 152 | 1   | 0.66   |          |      |            |     |     |        |          |      |            |            |

|                    |     |   |      |     |   |      |     |   |      |     |   |      |         |
|--------------------|-----|---|------|-----|---|------|-----|---|------|-----|---|------|---------|
| <b>01P100</b>      | 292 | 4 | 1.37 | 289 | 3 | 1.04 | 712 | 2 | 0.28 | 382 | 3 | 0.79 | PRL     |
| <b>01P107</b>      | 77  | 0 | 0    | 113 | 2 | 1.77 | 240 | 3 | 1.25 | 97  | 3 | 3.09 | PRL     |
|                    | 133 | 2 | 1.5  |     |   |      |     |   |      |     |   |      |         |
| <b>01P109</b>      | 166 | 3 | 1.81 | 131 | 1 | 0.76 | 214 | 1 | 0.47 | 251 | 2 | 0.8  | PRL     |
| <b>01P110</b>      | 217 | 3 | 1.38 | 190 | 2 | 1.05 | 310 | 4 | 1.29 |     |   |      | PRL     |
| <b>01P125</b>      | 20  | 1 | 5    | 20  | 0 | 0    | 59  | 1 | 1.69 | 52  | 2 | 3.85 | PRL     |
|                    | 35  | 1 | 2.86 |     |   |      |     |   |      |     |   |      |         |
| <b>01P126</b>      | 92  | 1 | 1.09 | 123 | 2 | 1.63 | 135 | 2 | 1.48 |     |   |      | PRL     |
| <b>01P129</b>      | 179 | 6 | 3.35 | 209 | 6 | 2.87 | 220 | 3 | 1.36 | 216 | 2 | 0.93 | PRL     |
| <b>01P040</b>      | 372 | 6 | 1.61 | 379 | 4 | 1.06 | 610 | 2 | 0.33 | 58  | 2 | 3.45 | PRL     |
| <b>01P137</b>      | 503 | 6 | 1.19 | 522 | 1 | 0.19 | 163 | 1 | 0.61 | 146 | 2 | 1.37 | PRL     |
| <b>01P141</b>      | 222 | 5 | 2.25 | 168 | 2 | 1.19 | 244 | 3 | 1.23 | 423 | 8 | 1.89 | PRL     |
| <b>01P162</b>      | 36  | 2 | 5.56 | 40  | 1 | 2.5  | 44  | 1 | 2.27 | 44  | 1 | 2.27 | PRL     |
| <b>01P174</b>      | 397 | 4 | 1.01 | 348 | 3 | 0.86 | 285 | 3 | 1.05 |     |   |      | PRL     |
| <b>01P178</b>      | 91  | 2 | 2.2  | 75  | 1 | 1.33 | 327 | 1 | 0.31 | 166 | 2 | 1.2  | PRL     |
| <b>01P188</b>      | 118 | 3 | 2.54 | 32  | 0 | 0    | 405 | 4 | 0.99 | 120 | 2 | 1.67 | PRL     |
| <b>01P190</b>      | 50  | 4 | 8    | 67  | 1 | 1.49 | 58  | 1 | 1.72 | 201 | 4 | 1.99 | PRL     |
|                    | 100 | 3 | 3    |     |   |      |     |   |      |     |   |      |         |
| <b>01P195</b>      | 181 | 4 | 2.21 | 201 | 5 | 2.49 | 340 | 3 | 0.88 |     |   |      | PRL     |
| <b>01P197</b>      | 111 | 3 | 2.7  | 126 | 2 | 1.59 | 222 | 2 | 0.9  |     |   |      | PRL     |
| <b>01P232</b>      | 123 | 4 | 3.25 | 139 | 2 | 1.44 | 213 | 3 | 1.41 |     |   |      | PRL     |
| <b>01P237</b>      | 358 | 3 | 0.84 | 387 | 5 | 1.29 | 522 | 3 | 0.57 |     |   |      | PRL     |
| <b>03P004</b>      | 140 | 5 | 3.57 | 70  | 1 | 1.43 | 26  | 1 | 3.85 | 72  | 1 | 1.39 | PRL     |
|                    | 60  | 2 | 3.33 | 203 | 6 | 2.96 | 248 | 4 | 1.61 | 285 | 2 | 0.7  |         |
| <b>03P005</b>      | 310 | 2 | 0.65 | 271 | 2 | 0.74 | 347 | 2 | 0.58 | 234 | 0 | 0    | PRL     |
|                    | 394 | 2 | 0.51 | 295 | 3 | 1.02 | 841 | 5 | 0.59 |     |   |      |         |
| <b>03P002</b>      | 371 | 3 | 0.81 | 505 | 2 | 0.4  | 132 | 1 | 0.76 | 116 | 1 | 0.86 | PRL     |
|                    | 98  | 2 | 2.04 | 87  | 2 | 2.3  |     |   |      |     |   |      |         |
| <b>03P001</b>      | 164 | 4 | 2.44 | 191 | 0 | 0    | 128 | 5 | 3.91 | 127 | 1 | 0.79 | PRL     |
|                    | 120 | 2 | 1.67 |     |   |      |     |   |      |     |   |      |         |
| <b>03P003</b>      | 465 | 5 | 1.08 | 321 | 1 | 0.31 | 416 | 4 | 0.96 | 377 | 5 | 1.33 | PRL     |
| <b>01M03<br/>1</b> | 114 | 3 | 2.63 | 26  | 1 | 3.85 | 25  | 0 | 0    | 80  | 1 | 1.25 | Mixed * |
| <b>02M20<br/>9</b> | 217 | 3 | 1.38 | 309 | 5 | 1.62 | 85  | 1 | 1.18 |     |   |      | Pluri#  |

All positive result (fractional abundance  $\geq 0.5\%$ ) were identified more than 3 times and the average value was presented.

FA, Fractional Abundance, it was the ratio of SF3B1R625H reads to wild type reads. The wild type replication  $< 20$  copies were excluded.

WT, Positive Events of wild type of *SF3BI*; Mut, Positive Events of mutant *SF3BI*<sup>R625H</sup>

\* Mixed, Mammosomatotroph/mixed somatotroph and lactotroph adenoma. The patient had symptoms of acromegaly with hyperprolactinemia (PRL 250ng/ml) and high GH level (16.7ng/ml). The tumor had positive immunostaining for PRL and GH.

# Pluri: Plurihormonal adenoma. It was a non-functioning pituitary adenoma with positive immunostaining for PRL, TSH and ACTH.

PRL, Prolactinoma

**Supplementary Table 4** The list of significant alternative splicing events in the comparison of *SF3B1*<sup>R625H</sup> with *SF3B1*<sup>WT</sup>. The p values by rMATS (replicate Multivariate Analysis of Transcript Splicing) are indicated.

**a, A3SS splicing type**

| Type | Gene           | Chr | Strand | Long ES   | Long EE   | Short ES  | Short EE  | Flanking ES | Flanking EE | P Value  | FDR      | Inc Level Difference |
|------|----------------|-----|--------|-----------|-----------|-----------|-----------|-------------|-------------|----------|----------|----------------------|
| A3SS | <i>ANKHD1</i>  | 5   | +      | 139818045 | 139818202 | 139818078 | 139818202 | 139815688   | 139815842   | 0        | 0        | -0.697               |
| A3SS | <i>MTERF2</i>  | 12  | -      | 107378892 | 107379003 | 107378892 | 107378993 | 107380746   | 107380944   | 0        | 0        | -0.814               |
| A3SS | <i>DYNLL1</i>  | 12  | +      | 120934204 | 120934356 | 120934218 | 120934356 | 120933858   | 120934019   | 0        | 0        | 0.509                |
| A3SS | <i>ORAI2</i>   | 7   | +      | 102076648 | 102076780 | 102076671 | 102076780 | 102073976   | 102074108   | 0        | 0        | 0.818                |
| A3SS | <i>BCLAF1</i>  | 6   | -      | 136596980 | 136597646 | 136596980 | 136597127 | 136599002   | 136599914   | 0        | 0        | -0.314               |
| A3SS | <i>TMEM14C</i> | 6   | +      | 10724788  | 10724866  | 10724802  | 10724866  | 10723147    | 10723474    | 0        | 0        | 0.678                |
| A3SS | <i>MED6</i>    | 14  | -      | 71059596  | 71059726  | 71059596  | 71059705  | 71060012    | 71060095    | 1.11E-16 | 3.93E-14 | 0.411                |
| A3SS | <i>FAM208A</i> | 3   | -      | 56654159  | 56657871  | 56654159  | 56657594  | 56658506    | 56658671    | 2.00E-15 | 6.19E-13 | -0.28                |
| A3SS | <i>VAMP1</i>   | 12  | -      | 6571403   | 6573652   | 6571403   | 6572008   | 6574055     | 6574107     | 3.00E-15 | 7.98E-13 | -0.2                 |
| A3SS | <i>VAMP1</i>   | 12  | -      | 6571403   | 6572135   | 6571403   | 6572008   | 6574055     | 6574107     | 3.22E-15 | 7.98E-13 | -0.203               |
| A3SS | <i>MORF4L2</i> | X   | -      | 102933426 | 102933579 | 102933426 | 102933528 | 102940098   | 102940188   | 2.65E-14 | 5.98E-12 | -0.243               |
| A3SS | <i>NCOA7</i>   | 6   | +      | 126210084 | 126211127 | 126210117 | 126211127 | 126206304   | 126206489   | 3.19E-13 | 6.58E-11 | 0.312                |
| A3SS | <i>SERBP1</i>  | 1   | -      | 67890570  | 67890660  | 67890570  | 67890642  | 67890765    | 67890906    | 2.87E-11 | 5.47E-09 | 0.264                |
| A3SS | <i>CDC27</i>   | 17  | -      | 45229171  | 45229302  | 45229171  | 45229284  | 45232037    | 45232152    | 1.32E-10 | 2.33E-08 | 0.273                |
| A3SS | <i>ZBED5</i>   | 11  | -      | 10874250  | 10876665  | 10874250  | 10876633  | 10877690    | 10877804    | 1.26E-08 | 2.08E-06 | 0.327                |
| A3SS | <i>APBB3</i>   | 5   | -      | 139941171 | 139941292 | 139941171 | 139941286 | 139941684   | 139941812   | 3.21E-08 | 4.97E-06 | -0.863               |
| A3SS | <i>THRA</i>    | 17  | +      | 38249272  | 38250120  | 38249389  | 38250120  | 38245458    | 38245586    | 5.32E-08 | 7.76E-06 | -0.298               |
| A3SS | <i>VEZT</i>    | 12  | +      | 95663814  | 95663964  | 95663826  | 95663964  | 95660132    | 95660408    | 1.51E-07 | 2.08E-05 | 0.252                |

|      |                 |    |   |           |           |           |           |           |           |            |            |        |
|------|-----------------|----|---|-----------|-----------|-----------|-----------|-----------|-----------|------------|------------|--------|
| A3SS | <i>ESRRG</i>    | 1  | - | 216737560 | 216737743 | 216737560 | 216737722 | 216741329 | 216741440 | 4.42E-07   | 5.77E-05   | 0.434  |
| A3SS | <i>YY1AP1</i>   | 1  | - | 155638417 | 155638568 | 155638417 | 155638508 | 155640110 | 155640255 | 5.97E-07   | 7.40E-05   | 0.211  |
| A3SS | <i>HSF4</i>     | 16 | + | 67201363  | 67201502  | 67201377  | 67201502  | 67201022  | 67201125  | 2.10E-06   | 0.00024735 | 0.513  |
| A3SS | <i>CREM</i>     | 10 | + | 35500181  | 35501886  | 35500583  | 35501886  | 35495822  | 35495979  | 2.71E-06   | 0.00030488 | -0.268 |
| A3SS | <i>CHD4</i>     | 12 | - | 67111125  | 67111341  | 67111125  | 67111320  | 67111541  | 67111663  | 7.97E-06   | 0.00085815 | 0.192  |
| A3SS | <i>GBGT1</i>    | 9  | - | 136028334 | 136029648 | 136028334 | 136029629 | 136030564 | 136030699 | 9.12E-06   | 0.00094131 | -0.397 |
| A3SS | <i>GORASP1</i>  | 3  | - | 39141795  | 39141994  | 39141795  | 39141945  | 39142237  | 39142368  | 2.72E-05   | 0.00263337 | -0.272 |
| A3SS | <i>RC3H1</i>    | 1  | - | 173912579 | 173912753 | 173912579 | 173912726 | 173915613 | 173915746 | 2.76E-05   | 0.00263337 | 0.225  |
| A3SS | <i>TRIM26</i>   | 6  | - | 30166442  | 30167041  | 30166442  | 30166930  | 30181081  | 30181271  | 4.61E-05   | 0.00423208 | -0.107 |
| A3SS | <i>ZSWIM8</i>   | 10 | + | 75554298  | 75554397  | 75554313  | 75554397  | 75553904  | 75554088  | 6.71E-05   | 0.00593457 | 0.267  |
| A3SS | <i>ZNF142</i>   | 2  | - | 219523702 | 219523853 | 219523702 | 219523758 | 219524091 | 219524263 | 0.00018475 | 0.01578034 | 0.256  |
| A3SS | <i>MVP</i>      | 16 | + | 29841794  | 29841995  | 29841835  | 29841995  | 29831714  | 29831831  | 0.00021676 | 0.01789703 | 0.391  |
| A3SS | <i>MAP2K7</i>   | 19 | + | 7976299   | 7976463   | 7976320   | 7976463   | 7976134   | 7976215   | 0.00024413 | 0.01950679 | 0.202  |
| A3SS | <i>SLC25A27</i> | 6  | + | 46644119  | 46645927  | 46644383  | 46645927  | 46638862  | 46638965  | 0.00030371 | 0.02287136 | -0.21  |
| A3SS | <i>SCNM1</i>    | 1  | + | 151140619 | 151140814 | 151140669 | 151140814 | 151139801 | 151139890 | 0.00030471 | 0.02287136 | -0.276 |
| A3SS | <i>GAS8</i>     | 16 | + | 90097583  | 90097904  | 90097706  | 90097904  | 90094043  | 90094130  | 0.00033339 | 0.02428854 | 0.43   |
| A3SS | <i>NEURL2</i>   | 20 | - | 44517110  | 44517526  | 44517110  | 44517512  | 44518888  | 44519926  | 0.00047072 | 0.03331331 | 0.519  |

**b, A5SS splicing type**

| Type | Gene          | Chr | Strand | Long ES   | Long EE   | Short ES  | Short EE  | Flanking ES | Flanking EE | P Value  | FDR      | Inc Level Difference |
|------|---------------|-----|--------|-----------|-----------|-----------|-----------|-------------|-------------|----------|----------|----------------------|
| A5SS | <i>NCOR2</i>  | 12  | -      | 124811954 | 124812179 | 124812092 | 124812179 | 124810736   | 124810916   | 9.50E-14 | 1.00E-10 | -0.321               |
| A5SS | <i>NDUFS5</i> | 1   | +      | 39491966  | 39492074  | 39491966  | 39492070  | 39494394    | 39494612    | 8.20E-14 | 1.00E-10 | -0.254               |

c, MXE splicing type

| Type | Gene                                                | Chr | Strand | 1 <sup>st</sup> ES | 1 <sup>st</sup> EE | 2 <sup>nd</sup> ES | 2 <sup>nd</sup> EE | Upstream ES | Upstream EE | Downstream ES | Downstream EE | P Value  | FDR       | Inc Level Difference |
|------|-----------------------------------------------------|-----|--------|--------------------|--------------------|--------------------|--------------------|-------------|-------------|---------------|---------------|----------|-----------|----------------------|
| MXE  | <i>TMEM14C</i>                                      | 6   | +      | 10724788           | 10724866           | 10725193           | 10725270           | 10723147    | 10723474    | 10726139      | 10726241      | 0        | 0         | 0.574                |
| MXE  | <i>H2AFY</i>                                        | 5   | -      | 13468651<br>2      | 13468660<br>3      | 13468863<br>5      | 134688735          | 134681657   | 134681747   | 134696186     | 134696297     | 8.22E-14 | 4.83E-10  | 0.179                |
| MXE  | <i>TGFBR1</i>                                       | 9   | +      | 10189479<br>0      | 10189502<br>1      | 10190014<br>0      | 101900371          | 101891136   | 101891382   | 101904817     | 101904985     | 1.69E-12 | 6.61E-09  | -0.261               |
| MXE  | <i>Orai2</i>                                        | 7   | +      | 10207667<br>1      | 10207678<br>0      | 10207939<br>0      | 102079628          | 102073976   | 102074108   | 102086959     | 102097268     | 1.86E-09 | 5.46E-06  | -0.244               |
| MXE  | <i>STAG3L</i><br><i>5P-PVRIG2</i><br><i>P-PILRB</i> | 7   | +      | 99952765           | 99952863           | 99954372           | 99954506           | 99950995    | 99951635    | 99955842      | 99955989      | 1.83E-08 | 4.32E-05  | 0.313                |
| MXE  | <i>LSR</i>                                          | 19  | +      | 35749847           | 35749967           | 35753448           | 35753595           | 35741217    | 35741562    | 35757261      | 35757435      | 2.89E-07 | 0.0005022 | 0.118                |
| MXE  | <i>SNAP25</i>                                       | 20  | +      | 10273529           | 10273647           | 10273808           | 10273926           | 10265371    | 10265420    | 10277572      | 10277698      | 2.99E-07 | 0.0005022 | -0.273               |
| MXE  | <i>CDC27</i>                                        | 17  | -      | 45221248           | 45221348           | 45229171           | 45229302           | 45219594    | 45219802    | 45232037      | 45232152      | 4.54E-07 | 0.0006684 | 0.151                |
| MXE  | <i>ARHGA P44</i>                                    | 17  | +      | 12877405           | 12877627           | 12883374           | 12883550           | 12862033    | 12862214    | 12887847      | 12888225      | 5.12E-07 | 0.0006702 | -0.184               |
| MXE  | <i>ZNF227</i>                                       | 19  | +      | 44721943           | 44722005           | 44732598           | 44732786           | 44717242    | 44717397    | 44738854      | 44741421      | 7.94E-07 | 0.0009343 | -0.349               |
| MXE  | <i>SNAP25</i>                                       | 20  | +      | 10273529           | 10273647           | 10273808           | 10273926           | 10258332    | 10258374    | 10277572      | 10277698      | 9.38E-07 | 0.0010035 | -0.26                |
| MXE  | <i>ZNF227</i>                                       | 19  | +      | 44721943           | 44722005           | 44732598           | 44732725           | 44717239    | 44717397    | 44738854      | 44741421      | 1.21E-06 | 0.0011853 | -0.386               |
| MXE  | <i>SNRPN</i>                                        | 15  | +      | 25207260           | 25207356           | 25213078           | 25213229           | 25200134    | 25200209    | 25219457      | 25219603      | 1.41E-06 | 0.001275  | 0.159                |
| MXE  | <i>ARHGA P44</i>                                    | 17  | +      | 12883374           | 12883550           | 12887847           | 12888225           | 12862033    | 12862214    | 12893348      | 12894960      | 2.81E-06 | 0.0023631 | 0.437                |
| MXE  | <i>SNRPN</i>                                        | 15  | +      | 25219457           | 25219603           | 25221451           | 25221563           | 25213078    | 25213229    | 25222023      | 25222176      | 3.11E-06 | 0.0024394 | -0.175               |
| MXE  | <i>SNAP25</i>                                       | 20  | +      | 10273529           | 10273647           | 10273808           | 10273926           | 10265371    | 10265420    | 10279915      | 10280060      | 1.37E-05 | 0.010087  | -0.296               |
| MXE  | <i>LOC103091866</i>                                 | 1   | +      | 14957760<br>7      | 14957766<br>2      | 14967020<br>8      | 149670452          | 149576261   | 149576700   | 149672300     | 149672983     | 2.64E-05 | 0.0177955 | -0.219               |
| MXE  | <i>TMEM14C</i>                                      | 6   | +      | 10724802           | 10724866           | 10725193           | 10725270           | 10723147    | 10723474    | 10726139      | 10726241      | 2.72E-05 | 0.0177955 | -0.262               |

|     |                |    |   |               |               |               |           |           |           |           |           |          |           |        |
|-----|----------------|----|---|---------------|---------------|---------------|-----------|-----------|-----------|-----------|-----------|----------|-----------|--------|
| MXE | <i>BPTF</i>    | 17 | + | 65962687      | 65962772      | 65971887      | 65972074  | 65960327  | 65960520  | 65978367  | 65980494  | 3.19E-05 | 0.0197784 | 0.175  |
| MXE | <i>STAU2</i>   | 8  | - | 74585341      | 74585477      | 74600888      | 74601048  | 74529526  | 74529686  | 74621266  | 74621397  | 4.74E-05 | 0.0279004 | 0.186  |
| MXE | <i>TMEM14C</i> | 6  | + | 10725193      | 10725270      | 10726139      | 10726241  | 10724802  | 10724866  | 10728872  | 10728960  | 5.49E-05 | 0.0307848 | 0.198  |
| MXE | <i>NEK1</i>    | 4  | - | 17045895<br>9 | 17045906<br>2 | 17047687<br>0 | 170477002 | 170429919 | 170430003 | 170477082 | 170477246 | 8.01E-05 | 0.0428321 | -0.298 |

d, RI splicing type

| Type | Gene           | Chr | Strand | RI ES     | RI EE     | Upstream ES | Upstream EE | Downstream ES | Downstream EE | P Value    | FDR        | Inc Level Difference |
|------|----------------|-----|--------|-----------|-----------|-------------|-------------|---------------|---------------|------------|------------|----------------------|
| RI   | <i>TCEB2</i>   | 16  | -      | 2821414   | 2822103   | 2821414     | 2821605     | 2821994       | 2822103       | 1.42E-08   | 9.89E-06   | -0.474               |
| RI   | <i>NAPA</i>    | 19  | -      | 47990890  | 47991646  | 47990890    | 47991147    | 47991491      | 47991646      | 4.17E-08   | 1.45E-05   | -0.245               |
| RI   | <i>CUTA</i>    | 6   | -      | 33385257  | 33386065  | 33385257    | 33385472    | 33385645      | 33386065      | 7.19E-07   | 0.00012659 | -0.219               |
| RI   | <i>HMGN3</i>   | 6   | -      | 79910961  | 79912106  | 79910961    | 79911443    | 79911992      | 79912106      | 7.28E-07   | 0.00012659 | -0.171               |
| RI   | <i>MAP3K12</i> | 12  | -      | 53880730  | 53881212  | 53880730    | 53880939    | 53881038      | 53881212      | 1.51E-06   | 0.00020987 | -0.404               |
| RI   | <i>MAP7D1</i>  | 1   | +      | 36641799  | 36642182  | 36641799    | 36641922    | 36642018      | 36642182      | 7.20E-06   | 0.00083538 | -0.245               |
| RI   | <i>CIART</i>   | 1   | +      | 150254942 | 150256043 | 150254942   | 150255028   | 150255871     | 150256043     | 1.46E-05   | 0.00144945 | -0.317               |
| RI   | <i>NFATC4</i>  | 14  | +      | 24845499  | 24848811  | 24845499    | 24846084    | 24846843      | 24848811      | 2.37E-05   | 0.00206506 | -0.404               |
| RI   | <i>LARP1B</i>  | 4   | +      | 129028293 | 129030059 | 129028293   | 129028468   | 129029037     | 129030059     | 0.00011127 | 0.00774444 | -0.244               |
| RI   | <i>EFHC1</i>   | 6   | +      | 52317485  | 52319085  | 52317485    | 52317635    | 52318892      | 52319085      | 0.00010031 | 0.00774444 | -0.236               |
| RI   | <i>RAB24</i>   | 5   | -      | 176730172 | 176730745 | 176730172   | 176730321   | 176730407     | 176730745     | 0.00018951 | 0.01199063 | -0.18                |
| RI   | <i>FAM195B</i> | 17  | -      | 79780236  | 79781187  | 79780236    | 79780783    | 79781084      | 79781187      | 0.00059773 | 0.03200163 | -0.216               |
| RI   | <i>AP1G2</i>   | 14  | -      | 24035024  | 24035369  | 24035024    | 24035101    | 24035272      | 24035369      | 0.00057925 | 0.03200163 | -0.271               |
| RI   | <i>LUC7L3</i>  | 17  | +      | 48827861  | 48830072  | 48827861    | 48828055    | 48829560      | 48830072      | 0.00074453 | 0.03701368 | -0.195               |
| RI   | <i>SCRN2</i>   | 17  | -      | 45915046  | 45915816  | 45915046    | 45915368    | 45915635      | 45915816      | 0.00089414 | 0.03929183 | -0.195               |



|    |               |    |   |           |           |           |           |           |           |            |            |        |
|----|---------------|----|---|-----------|-----------|-----------|-----------|-----------|-----------|------------|------------|--------|
| RI | <i>LRSAM1</i> | 9  | + | 130213764 | 130214363 | 130213764 | 130213948 | 130214207 | 130214363 | 0.00090326 | 0.03929183 | -0.222 |
| RI | <i>EED</i>    | 11 | + | 85988959  | 85989785  | 85988959  | 85989033  | 85989440  | 85989785  | 0.0011939  | 0.04887982 | -0.205 |

e, SE splicing type

| Type | Gene                | Chr | Strand | ES        | EE        | Upstream ES | Upstream EE | Downstream ES | Downstream EE | P Value  | FDR        | Inc Level Difference |
|------|---------------------|-----|--------|-----------|-----------|-------------|-------------|---------------|---------------|----------|------------|----------------------|
| SE   | <i>LRP8</i>         | 1   | -      | 53742363  | 53742750  | 53741302    | 53741425    | 53755238      | 53755361      | 3.96E-14 | 9.78E-10   | 0.025                |
| SE   | <i>PLEKHB2</i>      | 2   | +      | 131890474 | 131890588 | 131884256   | 131884359   | 131897742     | 131897848     | 5.16E-14 | 9.78E-10   | -0.164               |
| SE   | <i>GLS2</i>         | 12  | -      | 56873563  | 56873685  | 56871966    | 56872046    | 56881720      | 56882198      | 5.96E-14 | 9.78E-10   | 0.038                |
| SE   | <i>PLCXD1</i>       | X   | +      | 198148    | 198351    | 192990      | 193061      | 200833        | 200981        | 9.63E-14 | 1.18E-09   | -0.141               |
| SE   | <i>VPS13C</i>       | 15  | -      | 62315978  | 62316044  | 62315609    | 62315719    | 62325639      | 62325741      | 7.84E-13 | 7.71E-09   | -0.336               |
| SE   | <i>DCAF16</i>       | 4   | -      | 17806729  | 17806848  | 17802277    | 17806394    | 17812069      | 17812381      | 3.75E-11 | 3.07E-07   | -0.304               |
| SE   | <i>SYNE4</i>        | 19  | -      | 36497651  | 36497846  | 36497324    | 36497573    | 36499118      | 36499269      | 8.15E-11 | 5.73E-07   | 0.089                |
| SE   | <i>IFNAR1</i>       | 21  | +      | 34715840  | 34715982  | 34713304    | 34713480    | 34721396      | 34721596      | 4.68E-10 | 2.62E-06   | -0.005               |
| SE   | <i>PHF20L1</i>      | 8   | +      | 133811340 | 133811418 | 133811017   | 133811106   | 133816063     | 133816277     | 4.79E-10 | 2.62E-06   | 0.279                |
| SE   | <i>C21orf62-AS1</i> | 21  | +      | 34160922  | 34161012  | 34157107    | 34157230    | 34169248      | 34170016      | 8.92E-10 | 4.39E-06   | -0.055               |
| SE   | <i>TSTD1</i>        | 1   | -      | 161008340 | 161008463 | 161007702   | 161007865   | 161008669     | 161008774     | 1.07E-09 | 4.77E-06   | 0.23                 |
| SE   | <i>MYL6</i>         | 12  | +      | 56554409  | 56554454  | 56554026    | 56554104    | 56555170      | 56555366      | 1.02E-08 | 3.89E-05   | 0.198                |
| SE   | <i>SNHG16</i>       | 17  | +      | 74555026  | 74555125  | 74553845    | 74553939    | 74557369      | 74557484      | 1.03E-08 | 3.89E-05   | -0.222               |
| SE   | <i>METTL2B</i>      | 7   | +      | 128117135 | 128117227 | 128116782   | 128116929   | 128119211     | 128119567     | 1.33E-08 | 4.67E-05   | 0.356                |
| SE   | <i>IKBKB</i>        | 8   | +      | 42147673  | 42147791  | 42129600    | 42129723    | 42162704      | 42162793      | 1.90E-08 | 6.11E-05   | -0.133               |
| SE   | <i>ABCC5</i>        | 3   | -      | 183703091 | 183703166 | 183701540   | 183702682   | 183705557     | 183705705     | 1.99E-08 | 6.11E-05   | 0.191                |
| SE   | <i>MYEF2</i>        | 15  | -      | 48441228  | 48441280  | 48431624    | 48435268    | 48441359      | 48441568      | 1.53E-07 | 0.00044254 | -0.182               |

|    |                 |    |   |           |           |           |           |           |           |          |            |        |
|----|-----------------|----|---|-----------|-----------|-----------|-----------|-----------|-----------|----------|------------|--------|
| SE | <i>VPS13C</i>   | 15 | - | 62320556  | 62320619  | 62315609  | 62315719  | 62325639  | 62325741  | 4.81E-07 | 0.00131532 | -0.306 |
| SE | <i>LSR</i>      | 19 | + | 35753448  | 35753595  | 35749847  | 35749967  | 35757261  | 35757435  | 5.85E-07 | 0.00151502 | -0.224 |
| SE | <i>SNX19</i>    | 11 | - | 130750516 | 130750701 | 130749518 | 130749606 | 130773149 | 130773279 | 6.68E-07 | 0.00164388 | -0.411 |
| SE | <i>PHF14</i>    | 7  | + | 11021998  | 11022786  | 11014461  | 11014572  | 11030329  | 11030474  | 7.12E-07 | 0.00166769 | 0.195  |
| SE | <i>PLA2G7</i>   | 6  | - | 46690519  | 46690662  | 46684711  | 46684833  | 46702916  | 46703151  | 1.42E-06 | 0.00318155 | -0.547 |
| SE | <i>CD44</i>     | 11 | + | 35232792  | 35232996  | 35211381  | 35211612  | 35236398  | 35236461  | 1.59E-06 | 0.00339536 | 0.659  |
| SE | <i>ARHGAP44</i> | 17 | + | 12876618  | 12876636  | 12862033  | 12862214  | 12877405  | 12877627  | 4.36E-06 | 0.00858396 | 0.251  |
| SE | <i>TMEM14C</i>  | 6  | + | 10724788  | 10724866  | 10723147  | 10723474  | 10726139  | 10726241  | 4.30E-06 | 0.00858396 | 0.135  |
| SE | <i>C17orf80</i> | 17 | + | 71238382  | 71238490  | 71231614  | 71233134  | 71239034  | 71239142  | 6.19E-06 | 0.01171206 | -0.388 |
| SE | <i>NMRK1</i>    | 9  | - | 77684657  | 77684729  | 77683911  | 77684018  | 77684810  | 77684958  | 6.84E-06 | 0.0124695  | -0.227 |
| SE | <i>2-Mar</i>    | 19 | + | 8483420   | 8483691   | 8478186   | 8478304   | 8486672   | 8486900   | 8.36E-06 | 0.01417434 | -0.23  |
| SE | <i>MEG3</i>     | 14 | + | 101302378 | 101302412 | 101302072 | 101302216 | 101302503 | 101302637 | 8.23E-06 | 0.01417434 | 0.22   |
| SE | <i>FAM228B</i>  | 2  | + | 24384375  | 24384483  | 24369799  | 24369956  | 24387067  | 24387204  | 1.12E-05 | 0.01839426 | -0.392 |
| SE | <i>WDR35</i>    | 2  | - | 20162055  | 20162088  | 20160314  | 20160375  | 20166484  | 20166670  | 1.56E-05 | 0.02470807 | -0.406 |
| SE | <i>POGZ</i>     | 1  | - | 151413403 | 151413562 | 151403141 | 151403317 | 151414556 | 151414681 | 1.63E-05 | 0.02499942 | -0.175 |
| SE | <i>EML5</i>     | 14 | - | 89100812  | 89100833  | 89093989  | 89094163  | 89105152  | 89105251  | 1.69E-05 | 0.0251819  | 0.01   |
| SE | <i>RABGEF1</i>  | 7  | + | 66233817  | 66234012  | 66205642  | 66205779  | 66236869  | 66237065  | 2.38E-05 | 0.03436773 | -0.246 |
| SE | <i>CTNND1</i>   | 11 | + | 57556508  | 57556627  | 57529233  | 57529518  | 57558856  | 57559145  | 2.82E-05 | 0.03966933 | -0.217 |
| SE | <i>WDPCP</i>    | 2  | - | 63486445  | 63486544  | 63401804  | 63401967  | 63540382  | 63540446  | 3.19E-05 | 0.04362235 | 0.045  |

Chr, Chromosome; ES, Exon Start; EE, Exon End; RI ES, Retained Intron Event (upstream) Exon Start; RI EE, Retained Intron Event (downstream) Exon End; FDR, False Discovery Rate; Inc Level Difference, Inclusion Level Difference (Difference of the longer isoform between SF3B1 mutant and wild type)

Alternative splicing type: A3SS, Alternative 3' splice site; A5SS, Alternative 5' splice site; MXE, Mutually exclusive exons; RI, Retain intron; SE, Skipped exon

**Supplementary Table 5 List of the 20 most significant cryptic splicing events in the comparison of *SF3B1*<sup>R625H</sup> with *SF3B1*<sup>WT</sup> prolactinomas.**

| Gene                          | Type | Chr | Strand | Start Position | End Position | Inc Form Len | Skip Form Len | P Value  | FDR        | Inc Level Difference |
|-------------------------------|------|-----|--------|----------------|--------------|--------------|---------------|----------|------------|----------------------|
| <i>ANKHD1</i>                 | A3SS | 5   | +      | 139815688      | 139818202    | 143          | 117           | 0        | 0          | -0.697               |
| <i>MTERF2</i>                 | A3SS | 12  | -      | 107380746      | 107378993    | 104          | 94            | 0        | 0          | -0.814               |
| <i>DYNLL1</i>                 | A3SS | 12  | +      | 120933858      | 120934356    | 138          | 131           | 0        | 0          | 0.509                |
| <i>ORAI2</i>                  | A3SS | 7   | +      | 102073976      | 102076780    | 115          | 92            | 0        | 0          | 0.818                |
| <i>BCLAF1</i>                 | A3SS | 6   | -      | 136599002      | 136597127    | 270          | 135           | 0        | 0          | -0.314               |
| <i>TMEM14C</i>                | A3SS | 6   | +      | 10723147       | 10724866     | 71           | 57            | 0        | 0          | 0.678                |
| <i>TMEM14C</i>                | MXE  | 6   | +      | 10723147       | 10726241     | 102          | 100           | 0        | 0          | 0.574                |
| <i>MED6</i>                   | A3SS | 14  | -      | 71060012       | 71059705     | 64           | 43            | 1.11E-16 | 3.93E-14   | 0.411                |
| <i>NCOA7</i>                  | A3SS | 6   | +      | 126206304      | 126211127    | 161          | 135           | 3.19E-13 | 6.58E-11   | 0.312                |
| <i>NCOR2</i>                  | A5SS | 12  | -      | 124810736      | 124812179    | 211          | 80            | 9.50E-14 | 1.00E-10   | -0.321               |
| <i>VPS13C</i>                 | SE   | 15  | -      | 62315609       | 62325741     | 46           | 63            | 7.84E-13 | 7.71E-09   | -0.336               |
| <i>DCAF16</i>                 | SE   | 4   | -      | 17802277       | 17812381     | 224          | 135           | 3.75E-11 | 3.07E-07   | -0.304               |
| <i>ZBED5</i>                  | A3SS | 11  | -      | 10877690       | 10876633     | 132          | 107           | 1.26E-08 | 2.08E-06   | 0.327                |
| <i>APBB3</i>                  | A3SS | 5   | -      | 139941684      | 139941286    | 100          | 94            | 3.21E-08 | 4.97E-06   | -0.863               |
| <i>TCEB2</i>                  | RI   | 16  | -      | 2821414        | 2822103      | 237          | 102           | 1.42E-08 | 9.89E-06   | -0.474               |
| <i>STAG3L5P-PVRIG2P-PILRB</i> | MXE  | 7   | +      | 99950995       | 99955989     | 182          | 254           | 1.83E-08 | 4.32E-05   | 0.313                |
| <i>METTL2B</i>                | SE   | 7   | +      | 128116782      | 128119567    | 170          | 135           | 1.33E-08 | 4.67E-05   | 0.356                |
| <i>ESRRG</i>                  | A3SS | 1   | -      | 216741329      | 216737722    | 118          | 104           | 4.42E-07 | 5.77E-05   | 0.434                |
| <i>MAP3K12</i>                | RI   | 12  | -      | 53880730       | 53881212     | 184          | 135           | 1.51E-06 | 0.00020987 | -0.404               |
| <i>HSF4</i>                   | A3SS | 16  | +      | 67201022       | 67201502     | 93           | 79            | 2.10E-06 | 0.00024735 | 0.513                |

Chr, Chromosome; Inc Form Len, Length of the longer isoform (Inclusion isoform); Skip Form Len, Length of the shorter isoform (Skipped isoform); FDR, False Discovery Rate; Inc Level Difference, Inclusion Level Difference (Difference of the longer isoform between *SF3B1* mutant and wild type). The p values by rMATS(replicate Multivariate Analysis of Transcript Splicing ) are indicated.

**Supplementary Table 6 Inclusion and exclusion criteria.**

| <b>Inclusion Criteria</b>                                                                                                                                                                                                                                                                                                                                                                                                                                    |
|--------------------------------------------------------------------------------------------------------------------------------------------------------------------------------------------------------------------------------------------------------------------------------------------------------------------------------------------------------------------------------------------------------------------------------------------------------------|
| <ul style="list-style-type: none"><li>● PRL &gt; 90ng ml<sup>-1</sup></li><li>● Clinical symptoms related to hyperprolactinemia or mass effect, including amenorrhea, galactorrhea and dysgenesis in female, headache and visual impairment etc.</li><li>● Pathological diagnosis was pituitary adenoma and immunohistochemistry showed positive staining for PRL</li><li>● MRI/CT showed a sellar region lesion</li><li>● Informed consent signed</li></ul> |
| <b>Exclusion Criteria</b>                                                                                                                                                                                                                                                                                                                                                                                                                                    |
| <ul style="list-style-type: none"><li>● Preoperative blood GH level was higher than normal</li><li>● Immunohistochemistry showed strong positive staining for GH/ACTH/TSH/FSH/LH</li><li>● Not enough DNA of tumor for mutation analysis</li><li>● History of pituitary surgery or radiotherapy</li></ul>                                                                                                                                                    |

PRL, Prolactin; MRI, Magnetic Resonance Imaging; CT, Computed Tomography; GH, Growth Hormone; ACTH, Adrenocorticotrophic Hormone; TSH, Thyroid Stimulating Hormone; FSH, Follicle Stimulating Hormone; LH, Luteinizing Hormone.

**Supplementary Table 7 The clinical data of 227 prolactinoma patients.**

| Serial Number | Group               | SF3B1 <sup>R625H</sup> | Gender | Age (Years) | PRL (ng/ml) | Tumor Size (cm) | Knosp Classification | Tumor Invasion | Tumor Progression | PFS (weeks) | PRL/Tumor size | Source of specimens      |
|---------------|---------------------|------------------------|--------|-------------|-------------|-----------------|----------------------|----------------|-------------------|-------------|----------------|--------------------------|
| 01P019        | Initial Patient Set | Mutation               | Male   | 31          | 6000        | 7.6             | 4                    | Yes            | Yes               | 31.29       | 789.47         | Beijing Tiantan Hospital |
| 01P020        | Initial Patient Set | Mutation               | Male   | 55          | 5762        | 4.9             | 4                    | Yes            | Yes               | 17.00       | 1175.92        | Beijing Tiantan Hospital |
| 01P013        | Initial Patient Set | Wild                   | Male   | 20          | 197         | 3.3             | 4                    | Yes            | No                | 115.14      | 59.70          | Beijing Tiantan Hospital |
| 01P009        | Initial Patient Set | Wild                   | Male   | 48          | 3112        | 3.4             | 4                    | Yes            | No                | 188.29      | 915.29         | Beijing Tiantan Hospital |
| 02P015        | Initial Patient Set | Wild                   | Male   | 65          | 2560        | 3.3             | 4                    | Yes            | No                | 98.29       | 775.76         | Sanbo Brain Hospital     |
| 01P008        | Initial Patient Set | Wild                   | Male   | 37          | 464         | 2               | 0                    | No             | No                | 203.14      | 232.00         | Beijing Tiantan Hospital |
| 02P022        | Initial Patient Set | Wild                   | Female | 15          | 314         | 2.4             | 2                    | No             | No                | 54.00       | 130.83         | Sanbo Brain Hospital     |
| 01P028        | Initial Patient Set | Wild                   | Female | 38          | 133         | 3.6             | 4                    | Yes            | No                | 46.29       | 36.94          | Beijing Tiantan Hospital |
| 01P012        | Initial Patient Set | Wild                   | Male   | 45          | 2071        | 4.2             | 2                    | No             | No                | 128.14      | 493.10         | Beijing Tiantan Hospital |
| 01P004        | Initial Patient Set | Wild                   | Male   | 43          | 1068        | 6.2             | 4                    | Yes            | No                | 218.00      | 172.26         | Beijing Tiantan Hospital |
| 01P006        | Initial Patient Set | Wild                   | Female | 54          | 145         | 1.3             | 0                    | No             | Yes               | 47.29       | 111.54         | Beijing Tiantan Hospital |
| 01P001        | Initial Patient Set | Wild                   | Female | 25          | 103         | 1.4             | 0                    | No             | No                | 12.86       | 73.57          | Beijing Tiantan Hospital |
| 01P005        | Initial Patient Set | Wild                   | Female | 50          | 150         | 1.7             | 1                    | No             | No                | 209.86      | 88.24          | Beijing Tiantan Hospital |
| 01P027        | Initial Patient Set | Wild                   | Male   | 22          | 509         | 3.3             | 2                    | No             | No                | 13.00       | 154.24         | Beijing Tiantan Hospital |
| 01P011        | Initial Patient Set | Wild                   | Female | 48          | 127         | 1.4             | 1                    | No             | No                | 129.14      | 90.71          | Beijing Tiantan Hospital |
| 01P017        | Initial Patient Set | Wild                   | Female | 44          | 1960        | 3               | 2                    | No             | No                | 71.57       | 653.33         | Beijing Tiantan Hospital |
| 01P003        | Initial Patient Set | Wild                   | Male   | 42          | 189         | 5.4             | 3                    | Yes            | No                | 72.29       | 35.00          | Beijing Tiantan Hospital |

|        |                          |          |        |    |       |     |   |     |     |        |         |                          |
|--------|--------------------------|----------|--------|----|-------|-----|---|-----|-----|--------|---------|--------------------------|
| 01P002 | Initial Patient Set      | Wild     | Male   | 49 | 1122  | 2.4 | 1 | No  | No  | 120.14 | 467.50  | Beijing Tiantan Hospital |
| 01P024 | Initial Patient Set      | Wild     | Female | 20 | 766   | 2.3 | 3 | Yes | No  | 34.43  | 333.04  | Beijing Tiantan Hospital |
| 02P016 | Initial Patient Set      | Wild     | Male   | 30 | 1389  | 3   | 3 | Yes | No  | 96.86  | 463.00  | Sanbo Brain Hospital     |
| 02P023 | Initial Patient Set      | Wild     | Male   | 37 | 2119  | 6.1 | 4 | Yes | No  | 50.14  | 347.38  | Sanbo Brain Hospital     |
| 02P161 | Validation Patient Set 1 | Mutation | Male   | 39 | 6000  | 8.9 | 4 | Yes | No  | 289.29 | 674.16  | Sanbo Brain Hospital     |
| 02P193 | Validation Patient Set 1 | Mutation | Male   | 20 | 728.2 | 4.8 | 2 | Yes | Yes | 85.14  | 151.71  | Sanbo Brain Hospital     |
| 01P074 | Validation Patient Set 1 | Mutation | Female | 19 | 223   | 1.6 | 1 | No  | No  | 413.57 | 139.38  | Beijing Tiantan Hospital |
| 01P099 | Validation Patient Set 1 | Mutation | Female | 21 | 3404  | 2   | 1 | No  | No  | 373.57 | 1702.00 | Beijing Tiantan Hospital |
| 01P060 | Validation Patient Set 1 | Mutation | Male   | 54 | 615   | 2.1 | 1 | No  | No  | 336.71 | 292.86  | Beijing Tiantan Hospital |
| 02P249 | Validation Patient Set 1 | Mutation | Male   | 44 | 2931  | 5.4 | 4 | Yes | No  | 95.43  | 542.78  | Sanbo Brain Hospital     |
| 01P190 | Validation Patient Set 1 | Mutation | Male   | 53 | 1262  | 2   | 1 | No  | No  | 68.57  | 631.00  | Beijing Tiantan Hospital |
| 01P162 | Validation Patient Set 1 | Mutation | Male   | 20 | 1802  | 4.9 | 2 | No  | No  | 287.29 | 367.76  | Beijing Tiantan Hospital |
| 01P061 | Validation Patient Set 1 | Mutation | Male   | 41 | 2655  | 2.6 | 2 | No  | No  | 432.29 | 1021.15 | Beijing Tiantan Hospital |
| 02P157 | Validation Patient Set 1 | Mutation | Female | 38 | 131   | 0.8 | 0 | No  | No  | 62.14  | 163.75  | Sanbo Brain Hospital     |
| 01P125 | Validation Patient Set 1 | Mutation | Male   | 17 | 1394  | 4.8 | 4 | Yes | No  | 71.29  | 290.42  | Beijing Tiantan Hospital |
| 01P083 | Validation Patient Set 1 | Mutation | Male   | 41 | 1994  | 3   | 3 | Yes | No  | 389.86 | 664.67  | Beijing Tiantan Hospital |
| 01P129 | Validation Patient Set 1 | Mutation | Female | 40 | 226   | 1   | 0 | No  | No  | 339.57 | 226.00  | Beijing Tiantan Hospital |
| 01P091 | Validation Patient Set 1 | Mutation | Male   | 23 | 513   | 1.6 | 2 | No  | No  | 370.43 | 320.63  | Beijing Tiantan Hospital |
| 01P086 | Validation Patient Set 1 | Mutation | Male   | 44 | 593   | 4   | 2 | No  | No  | 389.71 | 148.25  | Beijing Tiantan Hospital |
| 01P232 | Validation Patient Set 1 | Mutation | Male   | 47 | 312   | 2.8 | 4 | Yes | Yes | 5.43   | 111.43  | Beijing Tiantan Hospital |
| 02P242 | Validation Patient Set 1 | Mutation | Female | 35 | 158   | 1.2 | 1 | No  | No  | 156.29 | 131.67  | Sanbo Brain Hospital     |

|        |                          |          |        |    |      |     |   |     |     |        |         |                          |
|--------|--------------------------|----------|--------|----|------|-----|---|-----|-----|--------|---------|--------------------------|
| 01P195 | Validation Patient Set 1 | Mutation | Male   | 53 | 1033 | 2.6 | 1 | No  | No  | 238.29 | 397.31  | Beijing Tiantan Hospital |
| 01P043 | Validation Patient Set 1 | Mutation | Male   | 39 | 3877 | 4.1 | 4 | Yes | No  | 472.71 | 945.61  | Beijing Tiantan Hospital |
| 07P090 | Validation Patient Set 1 | Mutation | Male   | 26 | 870  | 1.9 | 1 | No  | No  | 383.86 | 457.89  | Beijing Tiantan Hospital |
| 01P059 | Validation Patient Set 1 | Mutation | Male   | 33 | 592  | 1.5 | 0 | No  | No  | 435.43 | 394.67  | Beijing Tiantan Hospital |
| 01P197 | Validation Patient Set 1 | Mutation | Male   | 32 | 5076 | 4.1 | 2 | No  | Yes | 14.00  | 1238.05 | Beijing Tiantan Hospital |
| 01P141 | Validation Patient Set 1 | Mutation | Male   | 55 | 632  | 2.3 | 1 | No  | No  | 314.71 | 274.78  | Beijing Tiantan Hospital |
| 01P040 | Validation Patient Set 1 | Mutation | Female | 47 | 3929 | 3.8 | 4 | Yes | Yes | 141.43 | 1033.95 | Beijing Tiantan Hospital |
| 01P107 | Validation Patient Set 1 | Mutation | Male   | 43 | 274  | 2.1 | 2 | No  | No  | 367.29 | 130.48  | Beijing Tiantan Hospital |
| 02P163 | Validation Patient Set 1 | Mutation | Female | 20 | 217  | 0.6 | 0 | No  | No  | 284.43 | 361.67  | Sanbo Brain Hospital     |
| 01P126 | Validation Patient Set 1 | Mutation | Male   | 39 | 753  | 2   | 1 | No  | No  | 341.57 | 376.50  | Beijing Tiantan Hospital |
| 01P188 | Validation Patient Set 1 | Mutation | Male   | 33 | 2016 | 2.6 | 2 | No  | No  | 248.57 | 775.38  | Beijing Tiantan Hospital |
| 01P178 | Validation Patient Set 1 | Mutation | Male   | 45 | 911  | 2.5 | 1 | No  | No  | 261.43 | 364.40  | Beijing Tiantan Hospital |
| 01P110 | Validation Patient Set 1 | Mutation | Male   | 54 | 1366 | 2.9 | 2 | No  | No  | 362.71 | 471.03  | Beijing Tiantan Hospital |
| 01P084 | Validation Patient Set 1 | Mutation | Male   | 19 | 1078 | 3   | 1 | No  | No  | 388.71 | 359.33  | Beijing Tiantan Hospital |
| 01P063 | Validation Patient Set 1 | Mutation | Female | 54 | 666  | 4.7 | 3 | Yes | Yes | 2.29   | 141.70  | Beijing Tiantan Hospital |
| 01P174 | Validation Patient Set 1 | Mutation | Male   | 40 | 1968 | 2.4 | 1 | No  | No  | 265.71 | 820.00  | Beijing Tiantan Hospital |
| 01P109 | Validation Patient Set 1 | Mutation | Male   | 60 | 236  | 2.5 | 1 | No  | No  | 363.29 | 94.40   | Beijing Tiantan Hospital |
| 01P237 | Validation Patient Set 1 | Mutation | Male   | 32 | 5550 | 3.7 | 3 | Yes | No  | 164.57 | 1500.00 | Beijing Tiantan Hospital |
| 01P100 | Validation Patient Set 1 | Mutation | Male   | 38 | 6000 | 3.8 | 3 | Yes | No  | 373.14 | 1578.95 | Beijing Tiantan Hospital |
| 01P137 | Validation Patient Set 1 | Mutation | Male   | 29 | 3961 | 2.6 | 1 | No  | No  | 326.71 | 1523.46 | Beijing Tiantan Hospital |
| 01P076 | Validation Patient Set 1 | Mutation | Male   | 26 | 754  | 3   | 1 | No  | Yes | 373.00 | 251.33  | Beijing Tiantan Hospital |



|        |                          |      |        |    |        |     |   |     |     |        |         |                          |
|--------|--------------------------|------|--------|----|--------|-----|---|-----|-----|--------|---------|--------------------------|
| 01P082 | Validation Patient Set 1 | Wild | Male   | 50 | 2214   | 3.9 | 3 | Yes | No  | 394.29 | 567.69  | Beijing Tiantan Hospital |
| 01P146 | Validation Patient Set 1 | Wild | Male   | 31 | 1776   | 2.4 | 4 | Yes | N   | N      | 740.00  | Beijing Tiantan Hospital |
| 01P171 | Validation Patient Set 1 | Wild | Female | 51 | 1366   | 2.5 | 1 | No  | No  | 268.71 | 546.40  | Beijing Tiantan Hospital |
| 01P166 | Validation Patient Set 1 | Wild | Female | 34 | 386    | 1.6 | 0 | No  | No  | 278.71 | 241.25  | Beijing Tiantan Hospital |
| 01P222 | Validation Patient Set 1 | Wild | Male   | 25 | 276    | 3   | 3 | Yes | No  | 209.57 | 92.00   | Beijing Tiantan Hospital |
| 02P248 | Validation Patient Set 1 | Wild | Male   | 21 | 4392   | 4.1 | 4 | Yes | No  | 99.00  | 1071.22 | Sanbo Brain Hospital     |
| 02P153 | Validation Patient Set 1 | Wild | Male   | 48 | 489.8  | 1.7 | 2 | No  | No  | 302.43 | 288.12  | Sanbo Brain Hospital     |
| 01P219 | Validation Patient Set 1 | Wild | Male   | 50 | 3226   | 3   | 3 | Yes | No  | 214.71 | 1075.33 | Beijing Tiantan Hospital |
| 01P191 | Validation Patient Set 1 | Wild | Male   | 42 | 207    | 3.2 | 0 | No  | No  | 242.43 | 64.69   | Beijing Tiantan Hospital |
| 01P133 | Validation Patient Set 1 | Wild | Male   | 48 | 1604   | 3.5 | 3 | Yes | No  | 335.71 | 458.29  | Beijing Tiantan Hospital |
| 01P143 | Validation Patient Set 1 | Wild | Male   | 33 | 474    | 2.8 | 3 | Yes | No  | 309.71 | 169.29  | Beijing Tiantan Hospital |
| 01P132 | Validation Patient Set 1 | Wild | Male   | 48 | 2426   | 2.8 | 4 | Yes | No  | 334.86 | 866.43  | Beijing Tiantan Hospital |
| 02P206 | Validation Patient Set 1 | Wild | Male   | 30 | 2118.6 | 3.3 | 2 | No  | No  | 223.00 | 642.00  | Sanbo Brain Hospital     |
| 02P223 | Validation Patient Set 1 | Wild | Male   | 45 | 713    | 3.2 | 4 | Yes | No  | 209.00 | 222.81  | Sanbo Brain Hospital     |
| 01P142 | Validation Patient Set 1 | Wild | Male   | 25 | 6000   | 4.6 | 3 | Yes | Yes | 214.14 | 1304.35 | Beijing Tiantan Hospital |
| 01P077 | Validation Patient Set 1 | Wild | Male   | 29 | 271    | 2.5 | 2 | No  | No  | 407.43 | 108.40  | Beijing Tiantan Hospital |
| 02P187 | Validation Patient Set 1 | Wild | Female | 21 | 160.7  | 1.1 | 1 | No  | No  | 248.29 | 146.09  | Sanbo Brain Hospital     |
| 01P081 | Validation Patient Set 1 | Wild | Female | 28 | 482    | 3.6 | 3 | Yes | No  | 396.43 | 133.89  | Beijing Tiantan Hospital |
| 01P049 | Validation Patient Set 1 | Wild | Female | 20 | 668    | 2.6 | 2 | No  | No  | 461.29 | 256.92  | Beijing Tiantan Hospital |
| 01P111 | Validation Patient Set 1 | Wild | Male   | 39 | 169    | 1.6 | 1 | No  | No  | 360.86 | 105.63  | Beijing Tiantan Hospital |
| 01P072 | Validation Patient Set 1 | Wild | Male   | 21 | 244    | 1.8 | 2 | No  | No  | 417.00 | 135.56  | Beijing Tiantan Hospital |

|        |                          |      |        |    |        |     |   |     |     |        |         |                          |
|--------|--------------------------|------|--------|----|--------|-----|---|-----|-----|--------|---------|--------------------------|
| 02P273 | Validation Patient Set 1 | Wild | Male   | 18 | 4000   | 2.5 | 3 | Yes | No  | 28.00  | 1600.00 | Sanbo Brain Hospital     |
| 01P085 | Validation Patient Set 1 | Wild | Male   | 46 | 531    | 2.7 | 3 | Yes | No  | 388.29 | 196.67  | Beijing Tiantan Hospital |
| 01P096 | Validation Patient Set 1 | Wild | Male   | 45 | 349    | 2.3 | 2 | No  | No  | 377.71 | 151.74  | Beijing Tiantan Hospital |
| 02P236 | Validation Patient Set 1 | Wild | Female | 18 | 290.5  | 3   | 2 | No  | No  | 167.00 | 96.83   | Sanbo Brain Hospital     |
| 01P207 | Validation Patient Set 1 | Wild | Male   | 40 | 491    | 3.3 | 3 | Yes | No  | 221.00 | 148.79  | Beijing Tiantan Hospital |
| 01P030 | Validation Patient Set 1 | Wild | Male   | 42 | 2741.2 | 3.5 | 3 | Yes | N   | N      | 783.20  | Beijing Tiantan Hospital |
| 02P246 | Validation Patient Set 1 | Wild | Male   | 37 | 115.04 | 1.9 | 2 | No  | No  | 109.14 | 60.55   | Sanbo Brain Hospital     |
| 02P262 | Validation Patient Set 1 | Wild | Male   | 38 | 706.2  | 3.7 | 4 | Yes | No  | 58.00  | 190.86  | Sanbo Brain Hospital     |
| 02P240 | Validation Patient Set 1 | Wild | Female | 17 | 2299   | 2.8 | 2 | No  | No  | 158.00 | 821.07  | Sanbo Brain Hospital     |
| 01P105 | Validation Patient Set 1 | Wild | Female | 51 | 217    | 2.7 | 2 | No  | No  | 372.86 | 80.37   | Beijing Tiantan Hospital |
| 02P261 | Validation Patient Set 1 | Wild | Male   | 32 | 611    | 3.1 | 4 | Yes | No  | 70.29  | 197.10  | Sanbo Brain Hospital     |
| 02P270 | Validation Patient Set 1 | Wild | Male   | 29 | 1134.8 | 4   | 4 | Yes | No  | 35.14  | 283.70  | Sanbo Brain Hospital     |
| 01P065 | Validation Patient Set 1 | Wild | Female | 50 | 398    | 2.3 | 2 | No  | No  | 428.57 | 173.04  | Beijing Tiantan Hospital |
| 01P138 | Validation Patient Set 1 | Wild | Male   | 65 | 3196   | 2.4 | 3 | Yes | N   | N      | 1331.67 | Beijing Tiantan Hospital |
| 01P056 | Validation Patient Set 1 | Wild | Male   | 38 | 1277   | 4.2 | 4 | Yes | Yes | 30.86  | 304.05  | Beijing Tiantan Hospital |
| 01P067 | Validation Patient Set 1 | Wild | Male   | 29 | 6000   | 4.8 | 4 | Yes | No  | 58.14  | 1250.00 | Beijing Tiantan Hospital |
| 01P058 | Validation Patient Set 1 | Wild | Male   | 33 | 214    | 1.5 | 0 | No  | No  | 435.57 | 142.67  | Beijing Tiantan Hospital |
| 01P062 | Validation Patient Set 1 | Wild | Male   | 49 | 919    | 2.2 | 1 | No  | No  | 432.71 | 417.73  | Beijing Tiantan Hospital |
| 01P112 | Validation Patient Set 1 | Wild | Male   | 55 | 2741   | 2.7 | 2 | No  | No  | 16.00  | 1015.19 | Beijing Tiantan Hospital |
| 01P073 | Validation Patient Set 1 | Wild | Female | 30 | 778    | 1.4 | 2 | No  | No  | 415.29 | 555.71  | Beijing Tiantan Hospital |
| 01P239 | Validation Patient Set 1 | Wild | Male   | 27 | 1307   | 3.1 | 2 | No  | No  | 105.29 | 421.61  | Beijing Tiantan Hospital |

|        |                          |      |        |    |        |     |   |     |     |        |         |                          |
|--------|--------------------------|------|--------|----|--------|-----|---|-----|-----|--------|---------|--------------------------|
| 01P115 | Validation Patient Set 1 | Wild | Female | 9  | 1192   | 3.6 | 2 | No  | No  | 354.86 | 331.11  | Beijing Tiantan Hospital |
| 01P120 | Validation Patient Set 1 | Wild | Female | 40 | 532    | 2.4 | 2 | No  | Yes | 10.71  | 221.67  | Beijing Tiantan Hospital |
| 01P052 | Validation Patient Set 1 | Wild | Female | 23 | 364.2  | 2   | 3 | Yes | N   | N      | 182.10  | Beijing Tiantan Hospital |
| 01P103 | Validation Patient Set 1 | Wild | Male   | 32 | 2283   | 4.3 | 3 | Yes | No  | 373.43 | 530.93  | Beijing Tiantan Hospital |
| 01P054 | Validation Patient Set 1 | Wild | Male   | 39 | 640    | 2   | 1 | No  | No  | 446.14 | 320.00  | Beijing Tiantan Hospital |
| 01P238 | Validation Patient Set 1 | Wild | Male   | 26 | 2255   | 4.4 | 4 | Yes | No  | 162.71 | 512.50  | Beijing Tiantan Hospital |
| 01P198 | Validation Patient Set 1 | Wild | Male   | 23 | 486    | 2.6 | 1 | No  | No  | 234.14 | 186.92  | Beijing Tiantan Hospital |
| 01P033 | Validation Patient Set 1 | Wild | Female | 24 | 272.2  | 1.5 | 1 | No  | N   | N      | 181.47  | Beijing Tiantan Hospital |
| 01P113 | Validation Patient Set 1 | Wild | Male   | 40 | 1862   | 5.8 | 4 | Yes | Yes | 21.86  | 321.03  | Beijing Tiantan Hospital |
| 01P181 | Validation Patient Set 1 | Wild | Female | 26 | 417    | 1.5 | 1 | No  | No  | 257.29 | 278.00  | Beijing Tiantan Hospital |
| 01P034 | Validation Patient Set 1 | Wild | Male   | 45 | 649.6  | 2.2 | 2 | No  | N   | N      | 295.27  | Beijing Tiantan Hospital |
| 01P186 | Validation Patient Set 1 | Wild | Male   | 44 | 1062   | 3.6 | 3 | Yes | No  | 250.57 | 295.00  | Beijing Tiantan Hospital |
| 01P148 | Validation Patient Set 1 | Wild | Male   | 11 | 429    | 5.4 | 2 | No  | No  | 305.57 | 79.44   | Beijing Tiantan Hospital |
| 01P169 | Validation Patient Set 1 | Wild | Male   | 43 | 385    | 2.5 | 3 | Yes | No  | 267.57 | 154.00  | Beijing Tiantan Hospital |
| 01P114 | Validation Patient Set 1 | Wild | Female | 23 | 291    | 1   | 1 | No  | No  | 355.86 | 291.00  | Beijing Tiantan Hospital |
| 01P149 | Validation Patient Set 1 | Wild | Male   | 32 | 4562   | 3.4 | 4 | Yes | No  | 305.43 | 1341.76 | Beijing Tiantan Hospital |
| 01P095 | Validation Patient Set 1 | Wild | Female | 29 | 1521   | 2.4 | 3 | Yes | No  | 376.00 | 633.75  | Beijing Tiantan Hospital |
| 01P050 | Validation Patient Set 1 | Wild | Male   | 52 | 540    | 2.8 | 1 | No  | No  | 460.43 | 192.86  | Beijing Tiantan Hospital |
| 01P094 | Validation Patient Set 1 | Wild | Male   | 55 | 1490   | 2.8 | 4 | Yes | N   | N      | 532.14  | Beijing Tiantan Hospital |
| 01P108 | Validation Patient Set 1 | Wild | Male   | 52 | 1088   | 1.9 | 2 | No  | No  | 365.43 | 572.63  | Beijing Tiantan Hospital |
| 01P037 | Validation Patient Set 1 | Wild | Female | 21 | 356.94 | 0.9 | 0 | No  | No  | 494.71 | 396.60  | Beijing Tiantan Hospital |

|        |                          |      |        |    |        |     |   |     |    |        |         |                          |
|--------|--------------------------|------|--------|----|--------|-----|---|-----|----|--------|---------|--------------------------|
| 01P139 | Validation Patient Set 1 | Wild | Female | 46 | 3432   | 4.2 | 4 | Yes | No | 235.43 | 817.14  | Beijing Tiantan Hospital |
| 01P225 | Validation Patient Set 1 | Wild | Male   | 12 | 6000   | 5.6 | 4 | Yes | No | 206.43 | 1071.43 | Beijing Tiantan Hospital |
| 01P098 | Validation Patient Set 1 | Wild | Female | 37 | 215    | 1.5 | 1 | No  | No | 374.29 | 143.33  | Beijing Tiantan Hospital |
| 01P212 | Validation Patient Set 1 | Wild | Male   | 39 | 2902   | 4.2 | 4 | Yes | No | 144.14 | 690.95  | Beijing Tiantan Hospital |
| 01P182 | Validation Patient Set 1 | Wild | Female | 41 | 217    | 1.2 | 2 | No  | No | 256.86 | 180.83  | Beijing Tiantan Hospital |
| 01P275 | Validation Patient Set 1 | Wild | Female | 54 | 4148   | 4.5 | 2 | No  | No | 17.14  | 921.78  | Beijing Tiantan Hospital |
| 01P131 | Validation Patient Set 1 | Wild | Male   | 53 | 6000   | 4.9 | 4 | Yes | No | 337.57 | 1224.49 | Beijing Tiantan Hospital |
| 01P044 | Validation Patient Set 1 | Wild | Female | 31 | 1298   | 3.5 | 2 | No  | No | 470.43 | 370.86  | Beijing Tiantan Hospital |
| 01P087 | Validation Patient Set 1 | Wild | Male   | 40 | 221    | 1.8 | 2 | No  | N  | N      | 122.78  | Beijing Tiantan Hospital |
| 01P204 | Validation Patient Set 1 | Wild | Female | 21 | 304    | 2.4 | 1 | No  | No | 226.29 | 126.67  | Beijing Tiantan Hospital |
| 01P217 | Validation Patient Set 1 | Wild | Male   | 28 | 247    | 2.6 | 1 | No  | No | 216.71 | 95.00   | Beijing Tiantan Hospital |
| 01P036 | Validation Patient Set 1 | Wild | Male   | 38 | 2296.8 | 3.7 | 4 | Yes | N  | N      | 620.76  | Beijing Tiantan Hospital |
| 01P216 | Validation Patient Set 1 | Wild | Male   | 15 | 223    | 1.9 | 0 | No  | No | 216.57 | 117.37  | Beijing Tiantan Hospital |
| 01P210 | Validation Patient Set 1 | Wild | Male   | 43 | 1117   | 3.2 | 3 | Yes | No | 218.00 | 349.06  | Beijing Tiantan Hospital |
| 01P128 | Validation Patient Set 1 | Wild | Male   | 27 | 677    | 5.4 | 3 | Yes | No | 63.43  | 125.37  | Beijing Tiantan Hospital |
| 01P047 | Validation Patient Set 1 | Wild | Female | 36 | 1061   | 2.8 | 3 | Yes | No | 464.43 | 378.93  | Beijing Tiantan Hospital |
| 01P185 | Validation Patient Set 1 | Wild | Female | 13 | 2131   | 3.4 | 3 | Yes | No | 250.57 | 626.76  | Beijing Tiantan Hospital |
| 01P093 | Validation Patient Set 1 | Wild | Male   | 46 | 2522   | 4.1 | 2 | No  | No | 379.71 | 615.12  | Beijing Tiantan Hospital |
| 01P147 | Validation Patient Set 1 | Wild | Male   | 50 | 745    | 3.2 | 4 | Yes | N  | N      | 232.81  | Beijing Tiantan Hospital |
| 01P117 | Validation Patient Set 1 | Wild | Male   | 68 | 1221   | 2.5 | 2 | No  | No | 354.43 | 488.40  | Beijing Tiantan Hospital |
| 01P160 | Validation Patient Set 1 | Wild | Female | 24 | 1016   | 1.8 | 1 | No  | No | 289.00 | 564.44  | Beijing Tiantan Hospital |

|        |                          |      |        |    |       |     |   |     |     |        |         |                          |
|--------|--------------------------|------|--------|----|-------|-----|---|-----|-----|--------|---------|--------------------------|
| 01P228 | Validation Patient Set 1 | Wild | Female | 37 | 2125  | 2   | 3 | Yes | No  | 195.00 | 1062.50 | Beijing Tiantan Hospital |
| 01P127 | Validation Patient Set 1 | Wild | Female | 21 | 405   | 1.9 | 2 | No  | No  | 193.29 | 213.16  | Beijing Tiantan Hospital |
| 01P211 | Validation Patient Set 1 | Wild | Male   | 42 | 1694  | 3.5 | 2 | No  | No  | 219.71 | 484.00  | Beijing Tiantan Hospital |
| 01P101 | Validation Patient Set 1 | Wild | Male   | 48 | 3811  | 4.2 | 3 | Yes | No  | 372.43 | 907.38  | Beijing Tiantan Hospital |
| 01P176 | Validation Patient Set 1 | Wild | Male   | 38 | 2379  | 4.8 | 4 | Yes | No  | 265.00 | 495.63  | Beijing Tiantan Hospital |
| 01P055 | Validation Patient Set 1 | Wild | Female | 38 | 302   | 1.5 | 1 | No  | No  | 442.71 | 201.33  | Beijing Tiantan Hospital |
| 01P116 | Validation Patient Set 1 | Wild | Male   | 39 | 388   | 4   | 3 | Yes | No  | 18.14  | 97.00   | Beijing Tiantan Hospital |
| 01P102 | Validation Patient Set 1 | Wild | Male   | 39 | 1074  | 3.2 | 4 | Yes | No  | 374.43 | 335.63  | Beijing Tiantan Hospital |
| 01P064 | Validation Patient Set 1 | Wild | Female | 34 | 208   | 1.6 | 0 | No  | No  | 428.71 | 130.00  | Beijing Tiantan Hospital |
| 01P135 | Validation Patient Set 1 | Wild | Female | 28 | 679   | 2.4 | 2 | No  | No  | 332.43 | 282.92  | Beijing Tiantan Hospital |
| 01P168 | Validation Patient Set 1 | Wild | Male   | 54 | 896   | 2   | 1 | No  | No  | 270.57 | 448.00  | Beijing Tiantan Hospital |
| 01P177 | Validation Patient Set 1 | Wild | Male   | 15 | 579   | 1.7 | 2 | No  | No  | 264.00 | 340.59  | Beijing Tiantan Hospital |
| 01P097 | Validation Patient Set 1 | Wild | Female | 24 | 600   | 2.8 | 2 | No  | N   | N      | 214.29  | Beijing Tiantan Hospital |
| 01P079 | Validation Patient Set 1 | Wild | Female | 57 | 4434  | 4.3 | 4 | Yes | N   | N      | 1031.16 | Beijing Tiantan Hospital |
| 01P048 | Validation Patient Set 1 | Wild | Female | 31 | 455.4 | 1.3 | 2 | No  | N   | N      | 350.31  | Beijing Tiantan Hospital |
| 01P123 | Validation Patient Set 1 | Wild | Male   | 45 | 533   | 2.5 | 1 | No  | No  | 344.43 | 213.20  | Beijing Tiantan Hospital |
| 01P152 | Validation Patient Set 1 | Wild | Male   | 18 | 358   | 2.6 | 3 | Yes | No  | 303.00 | 137.69  | Beijing Tiantan Hospital |
| 01P136 | Validation Patient Set 1 | Wild | Male   | 65 | 295   | 3   | 3 | Yes | No  | 330.29 | 98.33   | Beijing Tiantan Hospital |
| 01P200 | Validation Patient Set 1 | Wild | Female | 42 | 386   | 1   | 0 | No  | No  | 230.00 | 386.00  | Beijing Tiantan Hospital |
| 01P196 | Validation Patient Set 1 | Wild | Male   | 54 | 1187  | 4.2 | 3 | Yes | No  | 234.29 | 282.62  | Beijing Tiantan Hospital |
| 01P124 | Validation Patient Set 1 | Wild | Male   | 49 | 416   | 2.8 | 3 | Yes | Yes | 39.00  | 148.57  | Beijing Tiantan Hospital |

|        |                          |      |        |    |        |     |   |     |     |        |        |                          |
|--------|--------------------------|------|--------|----|--------|-----|---|-----|-----|--------|--------|--------------------------|
| 01P071 | Validation Patient Set 1 | Wild | Male   | 22 | 4000   | 4.6 | 3 | Yes | Yes | 118.00 | 869.57 | Beijing Tiantan Hospital |
| 01P165 | Validation Patient Set 1 | Wild | Male   | 30 | 2236   | 3.7 | 4 | Yes | No  | 282.86 | 604.32 | Beijing Tiantan Hospital |
| 01P183 | Validation Patient Set 1 | Wild | Female | 30 | 370    | 1.4 | 1 | No  | Yes | 248.29 | 264.29 | Beijing Tiantan Hospital |
| 01P151 | Validation Patient Set 1 | Wild | Male   | 39 | 1175   | 3.7 | 3 | Yes | No  | 304.00 | 317.57 | Beijing Tiantan Hospital |
| 01P039 | Validation Patient Set 1 | Wild | Female | 31 | 344.2  | 1.5 | 0 | No  | No  | 482.57 | 229.47 | Beijing Tiantan Hospital |
| 01P134 | Validation Patient Set 1 | Wild | Female | 59 | 260    | 3   | 3 | Yes | No  | 335.14 | 86.67  | Beijing Tiantan Hospital |
| 01P230 | Validation Patient Set 1 | Wild | Male   | 22 | 548    | 3   | 4 | Yes | No  | 191.29 | 182.67 | Beijing Tiantan Hospital |
| 01P029 | Validation Patient Set 1 | Wild | Male   | 53 | 1575.8 | 5.2 | 4 | Yes | N   | N      | 303.04 | Beijing Tiantan Hospital |
| 01P144 | Validation Patient Set 1 | Wild | Male   | 34 | 3533   | 4   | 4 | Yes | N   | N      | 883.25 | Beijing Tiantan Hospital |
| 01P066 | Validation Patient Set 1 | Wild | Female | 24 | 431    | 3.2 | 1 | No  | No  | 17.86  | 134.69 | Beijing Tiantan Hospital |
| 01P173 | Validation Patient Set 1 | Wild | Male   | 31 | 3218   | 3.5 | 3 | Yes | No  | 267.43 | 919.43 | Beijing Tiantan Hospital |
| 01P272 | Validation Patient Set 1 | Wild | Female | 33 | 108    | 2.6 | 2 | No  | No  | 17.14  | 41.54  | Beijing Tiantan Hospital |
| 01P075 | Validation Patient Set 1 | Wild | Female | 17 | 1526   | 3.2 | 2 | No  | No  | 15.14  | 476.88 | Beijing Tiantan Hospital |
| 01P130 | Validation Patient Set 1 | Wild | Male   | 31 | 752    | 4.6 | 4 | Yes | Yes | 27.14  | 163.48 | Beijing Tiantan Hospital |
| 01P220 | Validation Patient Set 1 | Wild | Male   | 42 | 3931   | 4.2 | 3 | Yes | No  | 214.43 | 935.95 | Beijing Tiantan Hospital |
| 01P194 | Validation Patient Set 1 | Wild | Male   | 36 | 287    | 4.5 | 4 | Yes | No  | 238.29 | 63.78  | Beijing Tiantan Hospital |
| 01P069 | Validation Patient Set 1 | Wild | Male   | 50 | 1079   | 2.3 | 1 | No  | No  | 418.57 | 469.13 | Beijing Tiantan Hospital |
| 01P199 | Validation Patient Set 1 | Wild | Female | 25 | 312    | 1.3 | 1 | No  | No  | 13.86  | 240.00 | Beijing Tiantan Hospital |
| 01P164 | Validation Patient Set 1 | Wild | Male   | 32 | 767    | 2.2 | 2 | No  | No  | 19.00  | 348.64 | Beijing Tiantan Hospital |
| 01P180 | Validation Patient Set 1 | Wild | Male   | 33 | 1254   | 1.5 | 1 | No  | No  | 259.71 | 836.00 | Beijing Tiantan Hospital |
| 01P089 | Validation Patient Set 1 | Wild | Female | 23 | 254    | 2   | 2 | No  | Yes | 108.29 | 127.00 | Beijing Tiantan Hospital |

|        |                          |          |        |    |         |     |   |     |    |        |         |                                       |
|--------|--------------------------|----------|--------|----|---------|-----|---|-----|----|--------|---------|---------------------------------------|
| 01P167 | Validation Patient Set 1 | Wild     | Male   | 62 | 1183    | 3.4 | 3 | Yes | No | 269.57 | 347.94  | Beijing Tiantan Hospital              |
| 01P202 | Validation Patient Set 1 | Wild     | Male   | 35 | 2824    | 1.8 | 2 | No  | N  | N      | 1568.89 | Beijing Tiantan Hospital              |
| 01P080 | Validation Patient Set 1 | Wild     | Male   | 65 | 631     | 3.2 | 3 | Yes | No | 398.57 | 197.19  | Beijing Tiantan Hospital              |
| 01P140 | Validation Patient Set 1 | Wild     | Male   | 57 | 326     | 2.5 | 2 | No  | No | 314.86 | 130.40  | Beijing Tiantan Hospital              |
| 01P154 | Validation Patient Set 1 | Wild     | Male   | 11 | 759     | 3.3 | 2 | No  | No | 301.43 | 230.00  | Beijing Tiantan Hospital              |
| 01P192 | Validation Patient Set 1 | Wild     | Female | 18 | 300     | 1.6 | 2 | No  | No | 242.29 | 187.50  | Beijing Tiantan Hospital              |
| 01P078 | Validation Patient Set 1 | Wild     | Female | 47 | 293     | 1.5 | 2 | No  | No | 408.29 | 195.33  | Beijing Tiantan Hospital              |
| 01P032 | Validation Patient Set 1 | Wild     | Female | 21 | 427     | 1.4 | 0 | No  | No | 516.86 | 305.00  | Beijing Tiantan Hospital              |
| 01P159 | Validation Patient Set 1 | Wild     | Female | 54 | 1222    | 2.3 | 3 | Yes | No | 290.29 | 531.30  | Beijing Tiantan Hospital              |
| 02P205 | Validation Patient Set 1 | Wild     | Female | 32 | 308     | 1.2 | 2 | No  | No | 224.86 | 256.67  | Sanbo Brain Hospital                  |
| 02P203 | Validation Patient Set 1 | Wild     | Female | 31 | 97.32   | 0.5 | 2 | No  | No | 227.86 | 194.64  | Sanbo Brain Hospital                  |
| 02P172 | Validation Patient Set 1 | Wild     | Male   | 17 | 3514.6  | 2   | 4 | Yes | No | 267.00 | 1757.30 | Sanbo Brain Hospital                  |
| 02P247 | Validation Patient Set 1 | Wild     | Male   | 52 | 104     | 4   | 4 | Yes | No | 100.43 | 26.00   | Sanbo Brain Hospital                  |
| 02P227 | Validation Patient Set 1 | Wild     | Female | 34 | 136.64  | 0.8 | 0 | No  | No | 203.29 | 170.80  | Sanbo Brain Hospital                  |
| 03P004 | Validation Patient Set 2 | Mutation | Male   | 55 | > 200   |     |   |     | N  | N      |         | The First Affiliated Hospital of USTC |
| 03P001 | Validation Patient Set 2 | Mutation | Male   | 67 | >200.00 | 3   |   |     | N  | N      |         | The First Affiliated Hospital of USTC |
| 03P002 | Validation Patient Set 2 | Mutation | Male   | 45 | > 205   | 5   |   |     | N  | N      |         | The First Affiliated Hospital of USTC |
| 03P003 | Validation Patient Set 2 | Mutation | Male   | 65 | 525.3   | 3.6 |   |     | N  | N      |         | The First Affiliated Hospital of USTC |
| 03P005 | Validation Patient Set 2 | Mutation | Male   | 38 | >200.00 |     |   |     | N  | N      |         | The First Affiliated Hospital of USTC |
| 03P011 | Validation Patient Set 2 | Wild     | Female | 21 | 122.97  | 2.3 |   |     | N  | N      |         | The First Affiliated Hospital of USTC |
| 03P007 | Validation Patient Set 2 | Wild     | Male   | 29 | >200.00 | 3.5 |   |     | N  | N      |         | The First Affiliated Hospital of USTC |

|        |                          |      |        |    |         |     |  |   |   |                                       |
|--------|--------------------------|------|--------|----|---------|-----|--|---|---|---------------------------------------|
| 03P006 | Validation Patient Set 2 | Wild | Male   | 33 | >209.00 | 4   |  | N | N | The First Affiliated Hospital of USTC |
| 03P008 | Validation Patient Set 2 | Wild | Male   | 69 | 1263    | 3.4 |  | N | N | The First Affiliated Hospital of USTC |
| 03P016 | Validation Patient Set 2 | Wild | Female | 16 | 193.87  | 2   |  | N | N | The First Affiliated Hospital of USTC |
| 03P023 | Validation Patient Set 2 | Wild | Male   | 60 | >200.00 | 3   |  | N | N | The First Affiliated Hospital of USTC |
| 03P027 | Validation Patient Set 2 | Wild | Male   | 62 | > 209   |     |  | N | N | The First Affiliated Hospital of USTC |
| 03P017 | Validation Patient Set 2 | Wild | Male   | 22 | >200.00 | 2   |  | N | N | The First Affiliated Hospital of USTC |
| 03P019 | Validation Patient Set 2 | Wild | Female | 24 | >200.00 |     |  | N | N | The First Affiliated Hospital of USTC |
| 03P025 | Validation Patient Set 2 | Wild | Male   | 70 | >200.00 | 2.5 |  | N | N | The First Affiliated Hospital of USTC |
| 03P024 | Validation Patient Set 2 | Wild | Male   | 49 | 686.4   | 2.7 |  | N | N | The First Affiliated Hospital of USTC |
| 03P015 | Validation Patient Set 2 | Wild | Male   | 41 | 192.98  | 2   |  | N | N | The First Affiliated Hospital of USTC |
| 03P012 | Validation Patient Set 2 | Wild | Female | 56 | >209.00 | 2.3 |  | N | N | The First Affiliated Hospital of USTC |
| 03P013 | Validation Patient Set 2 | Wild | Male   | 58 | >209.00 | 2.2 |  | N | N | The First Affiliated Hospital of USTC |
| 03P028 | Validation Patient Set 2 | Wild | Male   | 43 | > 209   |     |  | N | N | The First Affiliated Hospital of USTC |
| 03P018 | Validation Patient Set 2 | Wild | Female | 60 | >200.00 | 1.7 |  | N | N | The First Affiliated Hospital of USTC |
| 03P010 | Validation Patient Set 2 | Wild | Male   | 66 | 2717    | 2.6 |  | N | N | The First Affiliated Hospital of USTC |
| 03P021 | Validation Patient Set 2 | Wild | Female | 63 | >209.00 | 3.2 |  | N | N | The First Affiliated Hospital of USTC |
| 03P009 | Validation Patient Set 2 | Wild | Male   | 38 | 3083    | 3.2 |  | N | N | The First Affiliated Hospital of USTC |
| 03P026 | Validation Patient Set 2 | Wild | Female | 44 | >200.00 | 2.4 |  | N | N | The First Affiliated Hospital of USTC |
| 03P022 | Validation Patient Set 2 | Wild | Male   | 66 | >200.00 | 3.2 |  | N | N | The First Affiliated Hospital of USTC |
| 03P014 | Validation Patient Set 2 | Wild | Female | 46 | 711     | 2.2 |  | N | N | The First Affiliated Hospital of USTC |
| 03P020 | Validation Patient Set 2 | Wild | Male   | 69 | >200.00 |     |  | N | N | The First Affiliated Hospital of USTC |



\*Tumor progression was defined when a patient developed postoperative symptomatic, biochemical or radiological recurrence.

#PFS: Progression Free Survival.

In validation patient set 2, N means no available data.

USTC, University of Science and Technology of China; FFPE, formalin-fixed paraffin embedded; DDPCR, Droplet digital PCR

**Supplementary Table 8 Primers used for CLIP-PCR.**

| Gene ID | Transcript ID  | Location  | Primer ID | Sequence (5'-3')                                                    |
|---------|----------------|-----------|-----------|---------------------------------------------------------------------|
| 2104    | NM_001243518.1 | 6-25      | P1        | Forward: GCGAGAATGTGATTGGGGTC<br>Reverse: GCTGTCAACGATACGCTACG      |
| 2104    | NM_001243518.1 | 112-131   | P2        | Forward: TCCAGCTGTTTCGTCCTTCAT<br>Reverse: GCTGTCAACGATACGCTACG     |
| 2104    | NM_001243518.1 | 231-250   | P3        | Forward: GAATGGCCATCAGAACGGAC<br>Reverse: GCTGTCAACGATACGCTACG      |
| 2104    | NM_001243518.1 | 345-364   | P4        | Forward: AGATCCCCAGACCAAGTGTG<br>Reverse: GCTGTCAACGATACGCTACG      |
| 2104    | NM_001243518.1 | 409-428   | P5        | Forward: GGTGACATCGCTTCTGGGTA<br>Reverse: GCTGTCAACGATACGCTACG      |
| 2104    | NM_001243518.1 | 506-524   | P6        | Forward: GCCCTGCCACGAATGAATG<br>Reverse: GCTGTCAACGATACGCTACG       |
| 2104    | NM_001243518.1 | 628-647   | P7        | Forward: GGAGGTCGGCAGAAGTACAA<br>Reverse: GCTGTCAACGATACGCTACG      |
| 2104    | NM_001243518.1 | 694-713   | P8        | Forward: TTGCTCTGGTCTGATCCTGC<br>Reverse: GCTGTCAACGATACGCTACG      |
| 2104    | NM_001243518.1 | 715-734   | P9        | Forward: GTTCAGCCAGCCAAAAGCC<br>Reverse: GCTGTCAACGATACGCTACG       |
| 2104    | NM_001243518.1 | 738-762   | P10       | Forward: TAACAAGATTGTCTCACATTTGTTG<br>Reverse: GCTGTCAACGATACGCTACG |
| 2104    | NM_001243518.1 | 765-784   | P11       | Forward: GGCTGAACCGGAGAAGATCT<br>Reverse: GCTGTCAACGATACGCTACG      |
| 2104    | NM_001243518.1 | 901-918   | P12       | Forward: TTCTCCACGCTGTCCCTG<br>Reverse: GCTGTCAACGATACGCTACG        |
| 2104    | NM_001243518.1 | 981-1000  | P13       | Forward: CCGGTCTCTTTCGTTTGAGG<br>Reverse: GCTGTCAACGATACGCTACG      |
| 2104    | NM_001243518.1 | 1082-1101 | P14       | Forward: TCCTGCAGCTGGTAAAGAAA<br>Reverse: GCTGTCAACGATACGCTACG      |
| 2104    | NM_001243518.1 | 1233-1252 | P15       | Forward: GCAGGATTATGAAGCTGGCC<br>Reverse: GCTGTCAACGATACGCTACG      |
| 2104    | NM_001243518.1 | 1291-1310 | P16       | Forward: ATGACACTGCCACTCCTGAG<br>Reverse: GCTGTCAACGATACGCTACG      |
| 2104    | NM_001243518.1 | 1327-1346 | P17       | Forward: GCCGTGCAGCATTTCTACAA<br>Reverse: GCTGTCAACGATACGCTACG      |

| Gene ID | Transcript ID  | Location  | Primer ID | Primer                                                              |
|---------|----------------|-----------|-----------|---------------------------------------------------------------------|
| 2104    | NM_001243519.1 | 28-47     | P2        | Forward: TCCAGCTGTTTCGTCCTTCAT<br>Reverse: GCTGTCAACGATACGCTACG     |
| 2104    | NM_001243519.1 | 147-166   | P3        | Forward: GAATGGCCATCAGAACGGAC<br>Reverse: GCTGTCAACGATACGCTACG      |
| 2104    | NM_001243519.1 | 261-280   | P4        | Forward: AGATCCCAGACCAAGTGTG<br>Reverse: GCTGTCAACGATACGCTACG       |
| 2104    | NM_001243519.1 | 325-344   | P5        | Forward: GGTGACATCGCTTCTGGGTA<br>Reverse: GCTGTCAACGATACGCTACG      |
| 2104    | NM_001243519.1 | 422-440   | P6        | Forward: GCCCTGCCACGAATGAATG<br>Reverse: GCTGTCAACGATACGCTACG       |
| 2104    | NM_001243519.1 | 544-563   | P7        | Forward: GGAGGTCCGCAGAAGTACAA<br>Reverse: GCTGTCAACGATACGCTACG      |
| 2104    | NM_001243519.1 | 610-629   | P9        | Forward: GTTCAGCCAGCCAAAAGCC<br>Reverse: GCTGTCAACGATACGCTACG       |
| 2104    | NM_001243519.1 | 633-657   | P10       | Forward: TAACAAGATTGTCTCACATTTGTTG<br>Reverse: GCTGTCAACGATACGCTACG |
| 2104    | NM_001243519.1 | 660-679   | P11       | Forward: GGCTGAACCGGAGAAGATCT<br>Reverse: GCTGTCAACGATACGCTACG      |
| 2104    | NM_001243519.1 | 796-813   | P12       | Forward: TTCTCCACGCTGTCCCTG<br>Reverse: GCTGTCAACGATACGCTACG        |
| 2104    | NM_001243519.1 | 876-895   | P13       | Forward: CCGGTCTCTTTTCGTTTGAGG<br>Reverse: GCTGTCAACGATACGCTACG     |
| 2104    | NM_001243519.1 | 977-996   | P14       | Forward: TCCTGCAGCTGGTAAAGAAA<br>Reverse: GCTGTCAACGATACGCTACG      |
| 2104    | NM_001243519.1 | 1128-1147 | P15       | Forward: GCAGGATTATGAAGCTGGCC<br>Reverse: GCTGTCAACGATACGCTACG      |
| 2104    | NM_001243519.1 | 1186-1205 | P16       | Forward: ATGACACTGCCACTCCTGAG<br>Reverse: GCTGTCAACGATACGCTACG      |
| 2104    | NM_001243519.1 | 1222-1241 | P17       | Forward: GCCGTGCAGCATTCTACAA<br>Reverse: GCTGTCAACGATACGCTACG       |
| 2104    | NM_001243519.1 | 619-643   | P18       | Forward: GCCAAAAGCCATATAACAAGATTG<br>Reverse: GCTGTCAACGATACGCTACG  |

## Supplementary Table 9 Primers for qRT-PCR and siRNA.

### a, Primers used for qRT-PCR analyses

| Gene                     | Primer                       |
|--------------------------|------------------------------|
| <i>SF3B1</i> -1- forward | 5'- GAAGGACGAGGCTGAGCAAT -3' |
| <i>SF3B1</i> -1-reverse  | 5'- GCGTACAGGATTCCGTCGAT -3' |
| <i>SF3B1</i> -2- forward | 5'- TCCAAAGATTGCAGACCGGG-3'  |
| <i>SF3B1</i> -2-reverse  | 5'-GATCAGGGGTTTTCCCTCCA-3'   |

| Gene                        | Transcript ID  | Location | Sequence (5'-3')                 |
|-----------------------------|----------------|----------|----------------------------------|
| <i>ESRRG</i><br>(canonical) | NM_001243519.1 | 541-562  | Forward: CGTGGAGGTCGGCAGAAGTACA  |
|                             |                | 759-779  | Reverse: GCCCATCCAATGATAACCACC   |
| <i>ESRRG</i><br>(cryptic)   | NM_001243518.1 | 615-636  | Forward: TGACAGAGTACGTGGAGGTCGG  |
|                             |                | 714-736  | Reverse: CTGCAGGATCAGACCAGAGCAAT |

### b, Sequence of siRNA

| Gene                       | Sequence                      |
|----------------------------|-------------------------------|
| <i>SF3B1</i> -1-sense      | 5'- GCACAGACCUCCAAAGAUUTT -3' |
| <i>SF3B1</i> -1-antisense  | 5'- AAUCUUUGGAGGUCUGUGCTT -3' |
| <i>SF3B1</i> -2-sense      | 5'- CCUGAUGAUUUAUACUACUTT-3'  |
| <i>SF3B1</i> -2-antisense  | 5'- AGUAUUGAAUAUCAUCAGGTT-3'  |
| <i>ESRRG</i> -1-sense      | 5'-GCCGCUUCAUGAAGUGUUUTT-3'   |
| <i>ESRRG</i> -1-antisense  | 5'-AAACACUUCAUGAAGCGGCTT-3'   |
| <i>ESRRG</i> -2--sense     | 5'- GCAAAGUCCCAAUGCACAATT-3'  |
| <i>ESRRG</i> -2-antisense  | 5'- UUGUGCAUUGGGACUUUGCTT-3'  |
| Negative control-sense     | 5'-UUCUCCGAACGUGUCACGUTT-3'   |
| Negative control-antisense | 5'-ACGUGACACGUUCGGAGAATT-3'   |

**Supplementary Table 10 PCR conditions for the validation of cryptic splicing events in selected genes identified by rMATS.**

| Gene                     | Primer Sequence                   | Product Size            | PCR Conditions                                                                                                                                             |
|--------------------------|-----------------------------------|-------------------------|------------------------------------------------------------------------------------------------------------------------------------------------------------|
| <i>THRA</i> (A3SS)       | 5'-CAACCACCGCAAACACAACA-3'        | Normal splicing 229bp;  | Initial<br>denaturation<br>98°C for<br>2 min<br>98°C 10 sec,<br>59°C 10 sec,<br>72°C 10 sec<br>for 32 cycles<br>final<br>extension of<br>72°C for<br>5 min |
|                          | 5'- CGGCCCTTGGAGACTTC-3'          | aberrant splicing 112bp |                                                                                                                                                            |
| <i>ANKHD1</i><br>(A3SS)  | 5'-CAGAAGGAGCAGACTTACGCACTG -3'   | Normal splicing 205bp;  |                                                                                                                                                            |
|                          | 5'- CTGTTTTCTGCTTTTCATCCGTGTC -3' | aberrant splicing 172bp |                                                                                                                                                            |
| <i>MED6</i> (A3SS)       | 5'- TCATGATCTTTGAAGTGCCACCAAT -3' | Normal splicing 156bp;  |                                                                                                                                                            |
|                          | 5'- TGCTGGAGTGATCTATCAGGCACC -3'  | aberrant splicing 177bp |                                                                                                                                                            |
| <i>TMEM14C</i><br>(A3SS) | 5'-CAACCACCGCAAACACAACA-3'        | Normal splicing 181bp;  |                                                                                                                                                            |
|                          | 5'- CGGCCCTTGGAGACTTC-3'          | aberrant splicing 195bp |                                                                                                                                                            |
| <i>MTERF2</i><br>(A3SS)  | 5'-CTCTCCCCACAGATCTTGTCCT-3'      | Normal splicing 253bp;  |                                                                                                                                                            |
|                          | 5'- ACTGTCGGGAGCTTCTTGAGAC-3'     | aberrant splicing 243bp |                                                                                                                                                            |
| <i>ESRRG</i><br>(A3SS)   | 5'-GGAATATGCTTCGCCATCCAA-3'       | Normal splicing 257bp;  |                                                                                                                                                            |
|                          | 5'- AGAGTACGTGGAGGTCGGCAGA-3'     | aberrant splicing 278bp |                                                                                                                                                            |
| <i>DYNLL1</i><br>(A3SS)  | 5'-CTTAGATGCGCCACGGTTTC-3'        | Normal splicing 236bp;  |                                                                                                                                                            |
|                          | 5'- ATGAGCCGCAATGTCCTTCT-3'       | aberrant splicing 250bp |                                                                                                                                                            |
| <i>NCOA7</i><br>(A3SS)   | 5'-GGTTGTTTCCATTGCGCTCTAC-3'      | Normal splicing 222bp;  |                                                                                                                                                            |
|                          | 5'- ATGGTCTGGAATCCGAAGTCA-3'      | aberrant splicing 189bp |                                                                                                                                                            |
| <i>APBB3</i> (A3SS)      | 5'-TGGCACTTGAGCATAACAGC-3'        | Normal splicing 176bp;  |                                                                                                                                                            |
|                          | 5'- GATGCCATGAGCCTAGTGAA-3'       | aberrant splicing 170bp |                                                                                                                                                            |
| <i>FAM208A</i><br>(A3SS) | 5'-TTTTTGATCTGTTCCACGTGATCCTT-3'  | Normal splicing 495bp;  |                                                                                                                                                            |
|                          | 5'-TGGGCTATCACAATTCAATCACAGAA-3'  | aberrant splicing 218bp |                                                                                                                                                            |
| <i>ZBED5</i> (A3SS)      | 5'- TCAATGCGCAGATGGAACATCA -3'    | Normal splicing 139bp;  |                                                                                                                                                            |
|                          | 5'- AAGCTGCCAAGGTGGAGAGAGG -3'    | aberrant splicing 171bp |                                                                                                                                                            |
| <i>Orai2</i> (A3SS)      | 5'-CCGGCGGAAGGAGGGAGGGG-3'        | Normal splicing 545bp;  |                                                                                                                                                            |
|                          | 5'- CCGTGGTGCAGGCGCTGAAGGCAA-3'   | aberrant splicing 568bp |                                                                                                                                                            |
| <i>TMEM14C</i><br>(MXE)  | 5'-CACTCTCCACCCGCTGAATG-3'        | Normal splicing 439bp;  |                                                                                                                                                            |
|                          | 5'-ACCCAGGCCGGCTAGACTGC-3'        | aberrant splicing 453bp |                                                                                                                                                            |
| <i>DCAF16</i> (SE)       | 5'-ATGCCCTTGGAACTGGTGA-3'         | Normal splicing 186bp;  |                                                                                                                                                            |
|                          | 5'-AGGGCTCCGCTTCGAGAGAC-3'        | aberrant splicing 222bp |                                                                                                                                                            |
| <i>ABCC5</i> (SE)        | 5'-ACACCTCGGCACTGATGGAG-3'        | Normal splicing 158bp;  |                                                                                                                                                            |
|                          | 5'- AATGAAGTTGGGCCAGACGC-3'       | aberrant splicing 232bp |                                                                                                                                                            |

**Supplementary Table 11 Sequence of TaqMan MGB probes and primers in ddPCR.**

| <b>Gene</b>     | <b>Sequence</b>                    |
|-----------------|------------------------------------|
| <i>SF3B1-PA</i> | HEX-5'-ATGTCCATAACACAAC -3'-MGB    |
| <i>SF3B1-PG</i> | FAM-5'-AGTATGTCCGTAACACA-3'-MGB    |
| <i>SF3B1-PF</i> | 5'- CTGGCTACTATGATCTCTACCATGAGA-3' |
| <i>SF3B1-PR</i> | 5'- GAGGCTACAACAGCAAAAGCTCTA-3'    |

**Supplementary Table 12 The different vector transfection groups in luciferase reporter assays.**

| <b>No.</b> | <b>Transfection vectors combination</b>                     |
|------------|-------------------------------------------------------------|
| 1          | pCDH+pCDNA3.1+pGL3-basic+pRL-TK                             |
| 2          | pCDH+pCDNA3.1-Pit-1+pGL3-basic+pRL-TK                       |
| 3          | pCDH-ESRRG-cryptic+pCDNA3.1+pGL3-basic+pRL-TK               |
| 4          | pCDH-ESRRG-cryptic+pCDNA3.1-Pit-1+pGL3-basic+pRL-TK         |
| 5          | pCDH-ESRRG-cryptic+pCDNA3.1+pGL3-basic-PRL-p+pRL-TK         |
| 6          | pCDH-ESRRG-canonical+pCDNA3.1+pGL3-basic+pRL-TK             |
| 7          | pCDH-ESRRG-canonical+pCDNA3.1-Pit-1+pGL3-basic+pRL-TK       |
| 8          | pCDH-ESRRG-canonical+pCDNA3.1+pGL3-basic-PRL-p+pRL-TK       |
| 9          | pCDH+pCDNA3.1+pGL3-basic-pRL-p+pRL-TK                       |
| 10         | pCDH+pCDNA3.1-Pit-1+pGL3-basic-pRL-p+pRL-TK                 |
| 11         | pCDH-ESRRG-canonical+pCDNA3.1-Pit-1+pGL3-basic-PRL-p+pRL-TK |
| 12         | pCDH-ESRRG-cryptic+pCDNA3.1-Pit-1+pGL3-basic-PRL-p+pRL-TK   |

## References

1. Li H, Durbin R. Fast and accurate short read alignment with Burrows-Wheeler transform. *Bioinformatics* 2009;25:1754-60.
2. Li H, Handsaker B, Wysoker A, et al. The Sequence Alignment/Map format and SAMtools. *Bioinformatics* 2009;25:2078-9.
3. DePristo MA, Banks E, Poplin R, et al. A framework for variation discovery and genotyping using next-generation DNA sequencing data. *Nat Genet* 2011;43:491-8.
4. Cibulskis K, Lawrence MS, Carter SL, et al. Sensitive detection of somatic point mutations in impure and heterogeneous cancer samples. *Nat Biotechnol* 2013;31:213-9.
5. Saunders CT, Wong WS, Swamy S, Becq J, Murray LJ, Cheetham RK. Strelka: accurate somatic small-variant calling from sequenced tumor-normal sample pairs. *Bioinformatics* 2012;28:1811-7.
6. Trapnell C, Pachter L, Salzberg SL. TopHat: discovering splice junctions with RNA-Seq. *Bioinformatics* 2009;25:1105-11.
7. Trapnell C, Williams BA, Pertea G, et al. Transcript assembly and quantification by RNA-Seq reveals unannotated transcripts and isoform switching during cell differentiation. *Nat Biotechnol* 2010;28:511-5.
